# Supplementary material for: Closing the gaps, and improving somatic structural variant analysis and benchmarking using CHM13-T2T
Source: HighWire-hosted journal article supplement (doi:10.1101/gr.279352.124), 2025-03-17
Supplement: Supplemental_Tables.xlsx [file Supplemental_Tables.xlsx]

## Sheet: SuppTable1 Samples
Supplementary table 1: Samples used in the analysis
Sample name	Source	Abbreviation	Sequencing platform	URL	Sample Type	Cancer Type	Ploidy	GRCh38	Liftover	CHM13-T2T
								Coverage	Coverage	Coverage
COLO829	Valle-Inclan et al	VAI_COLO829	ONT MinION	https://www.ebi.ac.uk/ena/browser/view/ERR2752452	Reference	Melanoma	Pseudo-tetraploid	54.12	54.83	53.52
COLO829BL	Valle-Inclan et al	VAI_COLO829BL	ONT MinION	https://www.ebi.ac.uk/ena/browser/view/ERR2752451	Reference	Blood control		39.26	39.64	38.72
COLO829	Pacbio Revio	PBR_COLO829	Pacific Biosciences Revio	https://downloads.pacbcloud.com/public/revio/2023Q2/COLO829/COLO829/	Reference	Melanoma	Pseudo-tetraploid	61.26	61.32	60.63
COLO829BL	Pacbio Revio	PBR_COLO829BL	Pacific Biosciences Revio	https://downloads.pacbcloud.com/public/revio/2023Q2/COLO829/COLO829-BL/	Reference	Blood control		63.41	63.49	62.66
COLO829	Canada's Michael Smith Genome Sciences Centre	GSC_COLO829	ONT PromethION	https://ega-archive.org/ study EGAS00001001385	Reference	Melanoma	Pseudo-tetraploid	68.53	69.38	67.81
COLO829BL	Canada's Michael Smith Genome Sciences Centre	GSC_COLO829BL	ONT PromethION	https://ega-archive.org/ study EGAS00001001385	Reference	Blood control		30.77	31.29	30.58
COLO829	ONT ODP Epi2me	ONT_COLO829	ONT PromethION	s3://ont-open-data/colo829_2023.04/	Reference	Melanoma	Pseudo-tetraploid	87.31	88.86	86.65
COLO829BL	ONT ODP Epi2me	ONT_COLO829BL	ONT PromethION	s3://ont-open-data/colo829_2023.04/	Reference	Blood control		52.78	53.81	52.23
POG1022 tumor	Long GSC	POG1022	ONT PromethION	https://ega-archive.org/ study EGAS00001001159	Patient	Lymphoma	Diploid	46.77	47.1	46.12
POG1022 control	Long GSC	POG1022SK	ONT PromethION	https://ega-archive.org/ study EGAS00001001159	Patient	Skin control	Diploid	24.48	24.54	24.12
POG044 tumor	Long GSC	POG044	ONT PromethION	https://ega-archive.org/ study EGAS00001001159	Patient	Oligodendroglioma	Diploid	63.28	64.45	62.65
POG044 control	Long GSC	POG044BL	ONT PromethION	https://ega-archive.org/ study EGAS00001001159	Patient	Blood control	Diploid	19.81	20.04	19.58
POG846 tumor	Long GSC	POG846	ONT PromethION	https://ega-archive.org/ study EGAS00001001159	Patient	Ovarian Cancer	Triploid	30.86	31.32	30.54
POG846 control	Long GSC	POG846OV	ONT PromethION	https://ega-archive.org/ study EGAS00001001159	Patient	Ovary	Diploid	13.74	14.07	13.59

## Sheet: SuppTable2 COLO829-hg38 cancer 
Supplementary Table 2A: COLO829-hg38 SV summary
SVTYPE	Sniffles strategy		Multi-tool strategy
	COUNT	PROPORTION	COUNT	PROPORTION
INS	16090	0.527092	11374	0.46157
DEL	14070	0.460919	12917	0.524186
DUP	57	0.00186726	218	0.00884668
INV	84	0.00275175	131	0.00531613
BND	225	0.00737077	2	8.11622e-05
TOTAL	30526	1	24642	1
Supplementary Table 2B: COLO829-hg38 somatic-cancer SVs
#CHROM	START	END	SVTYPE	SVLEN	ID	SUPPORT	MAVIS Annotation
Chr1	207807887	207841475	DEL	-33588	COLO829_SOMATIC_SV_01_DEL	mtool_colo829_gsc_grch38|0/1|0.365,mtool_colo829_ont_grch38|0/1|0.33, mtool_colo829_pbr_grch38|0/1|0.409,mtool_colo829_vai_grch38|0/1|0.327	None
Chr1	224458901	224612419	DUP	153518	COLO829_SOMATIC_SV_02_DUP	snf2_colo829_gsc_grch38|0/1|0.345,snf2_colo829_ont_grch38|0/1|0.368, snf2_colo829_pbr_grch38|0/1|0.379,snf2_colo829_vai_grch38|0/1|0.227	None
Chr1	224595102	224598323	DEL	-3221	COLO829_SOMATIC_SV_03_DEL	mtool_colo829_gsc_grch38|0/1|0.365,mtool_colo829_ont_grch38|0/1|0.33, mtool_colo829_pbr_grch38|0/1|0.409,mtool_colo829_vai_grch38|0/1|0.327	None
Chr1	236097261	236097261	INS	11105	COLO829_SOMATIC_SV_04_INS	mtool_colo829_gsc_grch38|1/1|1.0,mtool_colo829_ont_grch38|1/1|1.0, mtool_colo829_pbr_grch38|1/1|1.0,mtool_colo829_vai_grch38|1/1|1.0	None
Chr3	24523615	24524688	INV	1073	COLO829_SOMATIC_SV_05_INV	mtool_colo829_gsc_grch38|0/1|0.54,mtool_colo829_ont_grch38|0/1|0.465, mtool_colo829_pbr_grch38|0/1|0.536,mtool_colo829_vai_grch38|0/1|0.482	None
Chr3	26622431	26623009	INV	578	COLO829_SOMATIC_SV_06_INV	mtool_colo829_gsc_grch38|0/1|0.393,mtool_colo829_ont_grch38|0/1|0.392 mtool_colo829_pbr_grch38|0/1|0.387,mtool_colo829_vai_grch38|0/1|0.397	LRRC3B	Tumor supressor
Chr3	60147027	60218815	DEL	-71788	COLO829_SOMATIC_SV_07_DEL	snf2_colo829_gsc_grch38|0/1|0.292,snf2_colo829_ont_grch38|0/1|0.308 snf2_colo829_pbr_grch38|0/1|0.391,snf2_colo829_vai_grch38|0/1|0.259	FHIT	Fragile, likned to cancer
Chr4	65346236	65346236	INS	82	COLO829_SOMATIC_SV_08_INS	mtool_colo829_gsc_grch38|0/1|0.517,mtool_colo829_ont_grch38|0/1|0.483 mtool_colo829_pbr_grch38|0/1|0.5,mtool_colo829_vai_grch38|0/1|0.553	EPHA5	Cancer related
Chr4	187075166	187075166	INS	62	COLO829_SOMATIC_SV_09_INS	mtool_colo829_gsc_grch38|0/1|0.466,mtool_colo829_ont_grch38|0/1|0.433 mtool_colo829_pbr_grch38|0/1|0.474,mtool_colo829_vai_grch38|0/1|0.384	None
Chr5	28787890	28962989	DEL	-175099	COLO829_SOMATIC_SV_10_DEL	snf2_colo829_gsc_grch38|1/1|1.0,snf2_colo829_ont_grch38|1/1|1.0 snf2_colo829_pbr_grch38|0/1|0.739,snf2_colo829_vai_grch38|1/1|1.0	None
Chr7	5972483	5972483	INS	71	COLO829_SOMATIC_SV_11_INS	mtool_colo829_gsc_grch38|0/1|0.549,mtool_colo829_ont_grch38|0/1|0.47 mtool_colo829_pbr_grch38|0/1|0.325,mtool_colo829_vai_grch38|0/1|0.462	PMS2	DNA repair
Chr7	57403872	57436401	DEL	-32529	COLO829_SOMATIC_SV_12_DEL	mtool_colo829_gsc_grch38|0/1|0.735,mtool_colo829_ont_grch38|1/1|0.79 mtool_colo829_pbr_grch38|1/1|0.871,mtool_colo829_vai_grch38|0/1|0.659	None	Cancer related
Chr7	78560891	78628371	DEL	-67480	COLO829_SOMATIC_SV_13_DEL	snf2_colo829_gsc_grch38|0/1|0.357,snf2_colo829_ont_grch38|0/1|0.286 snf2_colo829_pbr_grch38|0/1|0.5,snf2_colo829_vai_grch38|0/0|0.214	MAGI2	Tumor supressor
Chr7	86215351	86224384	DUP	9033	COLO829_SOMATIC_SV_14_DUP	mtool_colo829_gsc_grch38|0/1|0.223,mtool_colo829_ont_grch38|0/0|0.108 mtool_colo829_pbr_grch38|0/0|0.207,mtool_colo829_vai_grch38|0/0|0.141	None
Chr7	104844620	104971856	DUP	127236	COLO829_SOMATIC_SV_15_DUP	snf2_colo829_gsc_grch38|0/1|0.409,snf2_colo829_ont_grch38|0/1|0.406 snf2_colo829_pbr_grch38|0/1|0.356,snf2_colo829_vai_grch38|0/1|0.383	LHFPL3	Tumor supressor
Chr7	110753275	110754403	DEL	-1128	COLO829_SOMATIC_SV_16_DEL	mtool_colo829_gsc_grch38|0/1|0.223,mtool_colo829_ont_grch38|0/1|0.26 mtool_colo829_pbr_grch38|0/1|0.236,mtool_colo829_vai_grch38|0/1|0.258	IMMP2L	Lung cancer associated
Chr7	126106070	126526847	DEL	-420777	COLO829_SOMATIC_SV_17_DEL	snf2_colo829_gsc_grch38|0/1|0.672,snf2_colo829_ont_grch38|0/1|0.743 snf2_colo829_pbr_grch38|0/1|0.698,snf2_colo829_vai_grch38|0/1|0.346	GRM8	Lung cancer associated
Chr7	126458434	126527387	INV	68953	COLO829_SOMATIC_SV_18_INV	snf2_colo829_gsc_grch38|0/1|0.455,snf2_colo829_ont_grch38|0/1|0.445 snf2_colo829_pbr_grch38|0/1|0.386,snf2_colo829_vai_grch38|0/1|0.427	GRM8	Lung cancer associated
Chr7	144262134	144391701	DEL	-129567	COLO829_SOMATIC_SV_19_DEL	snf2_colo829_gsc_grch38|0/1|0.397,snf2_colo829_ont_grch38|0/1|0.324 snf2_colo829_pbr_grch38|0/1|0.652,snf2_colo829_vai_grch38|0/1|0.37	None	Pancreatic cancer associated
Chr7	151049571	N[chr15:84141972[	BND	1	COLO829_SOMATIC_SV_20_BND	snf2_colo829_gsc_grch38|0/1|0.66,snf2_colo829_ont_grch38|0/1|0.636 snf2_colo829_pbr_grch38|1/1|0.812,snf2_colo829_vai_grch38|0/1|0.605	ASIC3	Cancer related
Chr7	158339323	158339461	DEL	-138	COLO829_SOMATIC_SV_21_DEL	snf2_colo829_gsc_grch38|1/1|1.0,snf2_colo829_ont_grch38|0/1|0.276 snf2_colo829_pbr_grch38|1/1|0.933,snf2_colo829_vai_grch38|0/0|0.1	FALSE POSITIVE	FALSE POSITIVE
Chr8	130235870	130262401	DUP	26531	COLO829_SOMATIC_SV_22_DUP	mtool_colo829_gsc_grch38|0/0|0.19,mtool_colo829_ont_grch38|0/0|0.113 mtool_colo829_pbr_grch38|None,mtool_colo829_vai_grch38|0/0|0.12	ASAP1	Gastric and breast cancer. Tumor progression, chemo resistance and progression
Chr9	28031837	28031837	INV	27305	COLO829_SOMATIC_SV_23_INV	mtool_colo829_gsc_grch38|0/1|0.561,mtool_colo829_ont_grch38|0/1|0.581 mtool_colo829_pbr_grch38|0/1|0.489,mtool_colo829_vai_grch38|0/1|0.475	LINGO2	Cancer related
Chr9	28031865	28034469	INV	2604	COLO829_SOMATIC_SV_24_INV	snf2_colo829_gsc_grch38|0/1|0.418,snf2_colo829_ont_grch38|0/1|0.394 snf2_colo829_pbr_grch38|0/1|0.37,snf2_colo829_vai_grch38|0/1|0.4	LINGO2	Cancer related
Chr9	28034302	28157694	DEL	-123392	COLO829_SOMATIC_SV_25_DEL	snf2_colo829_gsc_grch38|1/1|0.947,snf2_colo829_ont_grch38|1/1|1.0 snf2_colo829_pbr_grch38|1/1|0.808,snf2_colo829_vai_grch38|1/1|1.0	LINGO2	Cancer related
Chr10	7090915	N[chr19:17286830[	BND	1	COLO829_SOMATIC_SV_26_BND	snf2_colo829_gsc_grch38|0/1|0.436,snf2_colo829_ont_grch38|0/1|0.328 snf2_colo829_pbr_grch38|0/1|0.263,snf2_colo829_vai_grch38|0/1|0.25	ANKLE1	Cancer related
Chr10	7592410	N]chr18:9868619]	BND	1	COLO829_SOMATIC_SV_27_BND	snf2_colo829_gsc_grch38|0/0|0.105,snf2_colo829_ont_grch38|0/0|0.163 snf2_colo829_pbr_grch38|0/1|0.25,snf2_colo829_vai_grch38|0/1|0.22	ITIH5	Tumor supressor (Reciprocal COLO829_SOMATIC_SV_40_BND)
Chr10	87940543	87952372	DEL	-11829	COLO829_SOMATIC_SV_28_DEL	mtool_colo829_gsc_grch38|1/1|1.0,mtool_colo829_ont_grch38|1/1|0.8 mtool_colo829_pbr_grch38|1/1|1.0,mtool_colo829_vai_grch38|1/1|1.0	PTEN	Tumor supressor
Chr11	81074560	81382737	DEL	-308177	COLO829_SOMATIC_SV_29_DEL	snf2_colo829_gsc_grch38|0/1|0.625,snf2_colo829_ont_grch38|1/1|0.833 snf2_colo829_pbr_grch38|0/1|0.579,snf2_colo829_vai_grch38|1/1|0.793	None
Chr12	129287231	129287231	INS	267	COLO829_SOMATIC_SV_30_INS	mtool_colo829_gsc_grch38|0/1|0.724,mtool_colo829_ont_grch38|0/1|0.633 mtool_colo829_pbr_grch38|0/1|0.645,mtool_colo829_vai_grch38|0/1|0.725	TMEM132D	Ovarian cancer
Chr14	34545553	34545553	INS	2397	COLO829_SOMATIC_SV_31_INS	mtool_colo829_gsc_grch38|1/1|1.0,mtool_colo829_ont_grch38|1/1|0.966 mtool_colo829_pbr_grch38|1/1|1.0,mtool_colo829_vai_grch38|1/1|1.0	None
Chr14	72547940	72547940	INS	98	COLO829_SOMATIC_SV_32_INS	mtool_colo829_gsc_grch38|1/1|1.0,mtool_colo829_ont_grch38|1/1|1.0 mtool_colo829_pbr_grch38|1/1|1.0,mtool_colo829_vai_grch38|1/1|1.0	RGS6	Regulates cancer risk
Chr15	23440460	23461733	INV	21273	COLO829_SOMATIC_SV_33_INV	mtool_colo829_gsc_grch38|None,mtool_colo829_ont_grch38|None mtool_colo829_pbr_grch38|0/0|0.183,mtool_colo829_vai_grch38|0/0|0.126	GOLGA6L2
Chr15	23467473	23468892	DEL	-1419	COLO829_SOMATIC_SV_34_DEL	mtool_colo829_gsc_grch38|0/0|0.167,mtool_colo829_ont_grch38|0/0|0.129 mtool_colo829_pbr_grch38|0/0|0.152,mtool_colo829_vai_grch38|0/0|0.179	None
Chr15	23586515	23747557	INV	161042	COLO829_SOMATIC_SV_35_INV	snf2_colo829_gsc_grch38|0/1|0.381,snf2_colo829_ont_grch38|0/1|0.437 snf2_colo829_pbr_grch38|0/1|0.404,snf2_colo829_vai_grch38|0/1|0.33	MKRN3	Lung cancer *Unique to GRCh38
Chr16	58590638	58629419	DEL	-38781	COLO829_SOMATIC_SV_36_DEL	mtool_colo829_gsc_grch38|1/1|1.0,mtool_colo829_ont_grch38|1/1|1.0 mtool_colo829_pbr_grch38|1/1|1.0,mtool_colo829_vai_grch38|1/1|1.0
Chr16	78894743	79061104	DEL	-166361	COLO829_SOMATIC_SV_37_DEL	snf2_colo829_gsc_grch38|0/1|0.652,snf2_colo829_ont_grch38|1/1|1.0 snf2_colo829_pbr_grch38|1/1|0.833,snf2_colo829_vai_grch38|1/1|1.0	WWOX	Tumor supressor
Chr18	9868620	N]chr10:7592409]	BND	1	COLO829_SOMATIC_SV_38_BND	snf2_colo829_gsc_grch38|0/0|0.102,snf2_colo829_ont_grch38|0/0|0.143 snf2_colo829_pbr_grch38|0/0|0.214,snf2_colo829_vai_grch38|0/1|0.24	ITIH5	Tumor supressor(COLO829_SOMATIC_SV_28_BND)
Chr18	68712223	68715588	DEL	-3365	COLO829_SOMATIC_SV_39_DEL	mtool_colo829_gsc_grch38|0/0|0.208,mtool_colo829_ont_grch38|0/1|0.261 mtool_colo829_pbr_grch38|0/0|0.214,mtool_colo829_vai_grch38|0/0|0.185	TMX3	Cell proliferation
Chr19	17286003	N[chr10:7017548[	BND	1	COLO829_SOMATIC_SV_40_BND	snf2_colo829_gsc_grch38|0/1|0.286,snf2_colo829_ont_grch38|0/1|0.342 snf2_colo829_pbr_grch38|0/0|0.185,snf2_colo829_vai_grch38|0/1|0.257	ANKLE1	Cancer related
Chr20	13180080	13183452	DEL	-3372	COLO829_SOMATIC_SV_41_DEL	mtool_colo829_gsc_grch38|0/1|0.544,mtool_colo829_ont_grch38|0/1|0.516 mtool_colo829_pbr_grch38|0/1|0.469,mtool_colo829_vai_grch38|0/1|0.541	None
Chr20	14982313	15033302	DEL	-50989	COLO829_SOMATIC_SV_42_DEL	snf2_colo829_gsc_grch38|0/1|0.347,snf2_colo829_ont_grch38|0/1|0.301 snf2_colo829_pbr_grch38|0/1|0.309,snf2_colo829_vai_grch38|0/1|0.364	MACROD2	Cancer related
Chr20	15019976	15033194	DEL	-13218	COLO829_SOMATIC_SV_43_DEL	mtool_colo829_gsc_grch38|0/1|0.448,mtool_colo829_ont_grch38|0/1|0.237 mtool_colo829_pbr_grch38|0/1|0.431,mtool_colo829_vai_grch38|0/1|0.314	MACROD2	Cancer related
Chr22	33363264	33442413	DEL	-79149	COLO829_SOMATIC_SV_44_DEL	snf2_colo829_gsc_grch38|0/1|0.329,snf2_colo829_ont_grch38|0/1|0.255 snf2_colo829_pbr_grch38|0/0|0.196,snf2_colo829_vai_grch38|0/1|0.417	LARGE1	Liver cancer* Unique to GRCh38
ChrX	31178824	31198083	DEL	-19259	COLO829_SOMATIC_SV_45_DEL	mtool_colo829_gsc_grch38|0/1|0.679,mtool_colo829_ont_grch38|0/1|0.7 mtool_colo829_pbr_grch38|0/1|0.61,mtool_colo829_vai_grch38|0/1|0.606	DMD	Cancer related
ChrX	31283087	32020633	DEL	-737546	COLO829_SOMATIC_SV_46_DEL	snf2_colo829_gsc_grch38|1/1|1.0,snf2_colo829_ont_grch38|1/1|1.0 snf2_colo829_pbr_grch38|1/1|1.0,snf2_colo829_vai_grch38|1/1|1.0	DMD	Cancer related
ChrX	32059739	32274980	DEL	-215241	COLO829_SOMATIC_SV_47_DEL	snf2_colo829_gsc_grch38|1/1|0.923,snf2_colo829_ont_grch38|1/1|0.833 snf2_colo829_pbr_grch38|1/1|1.0,snf2_colo829_vai_grch38|0/1|0.7	DMD	Cancer related
ChrX	32080417	32183134	DEL	-102717	COLO829_SOMATIC_SV_48_DEL	snf2_colo829_gsc_grch38|1/1|1.0,snf2_colo829_ont_grch38|1/1|1.0 snf2_colo829_pbr_grch38|1/1|1.0,snf2_colo829_vai_grch38|1/1|1.0	DMD	Cancer related
ChrX	34041661	34044065	DEL	-2404	COLO829_SOMATIC_SV_49_DEL	snf2_colo829_gsc_grch38|1/1|0.915,snf2_colo829_ont_grch38|1/1|1.0 snf2_colo829_pbr_grch38|1/1|1.0,snf2_colo829_vai_grch38|1/1|0.969	None
Abbreviations:
SV	Structural Variant
DEL	Delerion
INS	Insertion
DUP	Duplication
INV	Inversion
BND	Break-end/Translocation
snf2	Sniffles2
serv	Serverus
nmsv	nanomonSV
ctsv	cuteSV
mtool	multi-tool approach
gsc	Genome Sequencing Center (BC, Canada)
ont	Oxford Nanopore
pbr	PacBio Revio
vai	Valle-Inclan

## Sheet: SuppTable3 COLO829-hg38 benchma
Supplementary Table 3: COLO829-hg38 benchmark
GRCh38					Initial classification			Benchmark
#CHROM	POS	SVTYPE	SVLEN	ID	TP	FP	FN	#CHROM	POS	SVTYPE	SVLEN	ID
					0	0	1	chr1	86871328	BND	1	truthset_1_1
Chr1	207807889	DEL	33584	COLO829_SOMATIC_SV_01_DEL	1	0	0	chr1	207807886	DEL	33591	truthset_3_1
Chr1	224458901	DUP	153518	COLO829_SOMATIC_SV_02_DUP	1	0	0	chr1	224458901	DUP	153517	truthset_4_1
Chr1	224595106	DEL	3187	COLO829_SOMATIC_SV_03_DEL	1	0	0	chr1	224595093	DEL	3239	truthset_5_1
Chr1	236097134	INS	11099	COLO829_SOMATIC_SV_04_INS	0	1	0
Chr3	24523615	INV	1073	COLO829_SOMATIC_SV_05_INV	1	0	0	chr3	24523617	INV	1074	truthset_6_1
					0	0	1	chr3	25359111	BND	1	truthset_7_1
					0	0	1	chr3	25359568	BND	1	truthset_8_1
					0	0	1	chr3	26390427	BND	1	truthset_9_1
Chr3	26622432	INV	577	COLO829_SOMATIC_SV_06_INV	1	0	0	chr3	26622431	INV	577	truthset_10_1
Chr3	60147027	DEL	71788	COLO829_SOMATIC_SV_07_DEL	1	0	0	chr3	60147026	DEL	71789	truthset_11_1
					0	0	1	chr3	60886452	DEL	141091	truthset_12_1
					0	0	1	chr3	186724386	DEL	71459	truthset_13_1
Chr4	65346237	INS	83	COLO829_SOMATIC_SV_08_INS	1	0	0	chr4	65346239	DUP	80	truthset_14_1
Chr4	187075167	INS	61	COLO829_SOMATIC_SV_09_INS	1	0	0	chr4	187075168	DUP	60	truthset_15_1
Chr5	28787890	DEL	175099	COLO829_SOMATIC_SV_10_DEL	1	0	0	chr5	28787889	DEL	175100	truthset_16_1
					0	0	1	chr6	26193889	INV	289	truthset_18_1
					0	0	1	chr6	138452922	BND	1	truthset_19_1
					0	0	1	chr6	138453044	BND	1	truthset_20_1
Chr7	5972497	INS	69	COLO829_SOMATIC_SV_11_INS	0	1	0
Chr7	57403875	DEL	32528	COLO829_SOMATIC_SV_12_DEL	1	0	0	chr7	57403873	DEL	24534	truthset_22_1
					0	0	1	chr7	78352522	DEL	100409	truthset_23_1
Chr7	78560891	DEL	67480	COLO829_SOMATIC_SV_13_DEL	1	0	0	chr7	78560889	DEL	67479	truthset_24_1
Chr7	86224384	DUP	9033	COLO829_SOMATIC_SV_14_DUP	1	0	0	chr7	86215352	DUP	9032	truthset_25_1
Chr7	104844620	DUP	127236	COLO829_SOMATIC_SV_15_DUP	1	0	0	chr7	104844621	DUP	127234	truthset_26_1
Chr7	110753277	DEL	1128	COLO829_SOMATIC_SV_16_DEL	1	0	0	chr7	110753276	DEL	1129	truthset_27_1
Chr7	126106070	DEL	420777	COLO829_SOMATIC_SV_17_DEL	1	0	0	chr7	126106071	DEL	420776	truthset_28_1
Chr7	126458434	INV	68953	COLO829_SOMATIC_SV_18_INV	1	0	0	chr7	126458436	INV	68951	truthset_29_1
Chr7	144262134	DEL	129567	COLO829_SOMATIC_SV_19_DEL	1	0	0	chr7	144262133	DEL	129568	truthset_30_1
Chr7	151049571	BND	1	COLO829_SOMATIC_SV_20_BND	1	0	0	chr7	151049570	BND	1	truthset_31_1
Chr7	158339323	DEL	138	COLO829_SOMATIC_SV_21_DEL	0	1	0
					0	0	1	chr8	111050191	DEL	1163	truthset_32_1
Chr8	130235870	DUP	26531	COLO829_SOMATIC_SV_22_DUP	1	0	0	chr8	130235870	DUP	26531	truthset_33_1
Chr9	28031838	INV	27305	COLO829_SOMATIC_SV_23_INV	1	0	0	chr9	28031837	INV	27305	truthset_34_1
Chr9	28031865	INV	2604	COLO829_SOMATIC_SV_24_INV	1	0	0	chr9	28031865	INV	2604	truthset_35_1
Chr9	28034302	DEL	123392	COLO829_SOMATIC_SV_25_DEL	1	0	0	chr9	28034301	DEL	123393	truthset_36_1
					0	0	1	chr10	7017550	BND	1	truthset_38_1
Chr10	7090915	BND	1	COLO829_SOMATIC_SV_26_BND	1	0	0	chr10	7090912	BND	1	truthset_39_1
Chr10	7592410	BND	1	COLO829_SOMATIC_SV_27_BND	1	0	0	chr10	7592410	BND	1	truthset_40_1
					0	0	1	chr10	33097525	DEL	2732610	truthset_41_1
					0	0	1	chr10	53716587	DEL	549	truthset_42_1
					0	0	1	chr10	58717662	BND	1	truthset_43_1
					0	0	1	chr10	81882050	DEL	185860	truthset_44_1
Chr10	87940543	DEL	11829	COLO829_SOMATIC_SV_28_DEL	1	0	0	chr10	87940542	DEL	12042	truthset_45_1
Chr11	81074560	DEL	308177	COLO829_SOMATIC_SV_29_DEL	1	0	0	chr11	81074557	DEL	308180	truthset_46_1
Chr12	129287232	INS	274	COLO829_SOMATIC_SV_30_INS	1	0	0	chr12	129287232	INS	255	truthset_48_1
Chr14	34545584	INS	2501	COLO829_SOMATIC_SV_31_INS	0	1	0
Chr14	72547941	INS	97	COLO829_SOMATIC_SV_32_INS	1	0	0	chr14	72547941	INS	96	truthset_49_1
					0	0	1	chr14	104093751	DEL	55	truthset_50_1
					0	0	1	chr14	105867667	INS	100	truthset_51_1
Chr15	23440460	INV	21273	COLO829_SOMATIC_SV_33_INV	1	0	0	chr15	23440461	BND	1	truthset_52_1
					0	0	1	chr15	23461732	BND	1	truthset_53_1
Chr15	23467456	DEL	-4567	COLO829_SOMATIC_SV_34_DEL	0	1	0
Chr15	23586515	INV	161042	COLO829_SOMATIC_SV_35_INV	1	0	0	chr15	23586513	INV	161040	truthset_54_1
					0	0	1	chr15	41329096	DUP	7212	truthset_55_1
Chr16	58590638	DEL	38781	COLO829_SOMATIC_SV_36_DEL	1	0	0	chr16	58590641	DEL	38786	truthset_56_1
Chr16	78894743	DEL	166361	COLO829_SOMATIC_SV_37_DEL	1	0	0	chr16	78894739	DEL	166371	truthset_57_1
Chr18	9868620	BND	1	COLO829_SOMATIC_SV_38_BND	0	1	0
Chr18	68712224	DEL	3365	COLO829_SOMATIC_SV_39_DEL	1	0	0	chr18	68712224	DEL	3365	truthset_58_1
Chr19	17286003	BND	1	COLO829_SOMATIC_SV_40_BND	0	1	0
Chr20	13180081	DEL	3372	COLO829_SOMATIC_SV_41_DEL	1	0	0	chr20	13180082	DEL	3374	truthset_59_1
Chr20	14982313	DEL	50989	COLO829_SOMATIC_SV_42_DEL	1	0	0	chr20	14982311	DEL	50991	truthset_60_1
Chr20	15019977	DEL	13219	COLO829_SOMATIC_SV_43_DEL	1	0	0	chr20	15019977	DEL	13219	truthset_61_1
Chr22	33363264	DEL	79149	COLO829_SOMATIC_SV_44_DEL	1	0	0	chr22	33363263	DEL	79150	truthset_63_1
ChrX	31178841	DEL	19250	COLO829_SOMATIC_SV_45_DEL	1	0	0	chrX	31178826	DEL	19268	truthset_64_1
ChrX	31283087	DEL	737546	COLO829_SOMATIC_SV_46_DEL	1	0	0	chrX	31283086	DEL	737547	truthset_65_1
ChrX	32059739	DEL	215241	COLO829_SOMATIC_SV_47_DEL	1	0	0	chrX	32059738	DEL	215242	truthset_66_1
ChrX	32080417	DEL	102717	COLO829_SOMATIC_SV_48_DEL	1	0	0	chrX	32080415	DEL	102719	truthset_67_1
ChrX	34041661	DEL	2404	COLO829_SOMATIC_SV_49_DEL	1	0	0	chrX	34041661	DEL	2927	truthset_68_1
					42	7	20

## Sheet: SuppTable4 COLO829-hg38 FP anal
Supplementary Table 4: False Positive analysis COLO829-hg38
#CHROM	POS	SVTYPE	SVLEN	Samples (order)	Evidence Cancer samples	Evidence Blood controls	is FP (adjusted)	Reason is FP
Chr1	236097134	INS	11099	snf2_gsc_grch38 snf2_ont_grch38 snf2_pbr_grch38 snf2_vai_grch38 serv_gsc_grch38 serv_ont_grch38 serv_pbr_grch38 serv_vai_grch38 nmsv_gsc_grch38 nmsv_ont_grch38 nmsv_pbr_grch38 nmsv_vai_grch38 cutesv_gsc_grch38 cutesv_pbr_grch38 cutesv_vai_grch38	1/1:60:0:34 1/1:60:0:230 1/1:60:0:59 1/1:60:0:61 1/1:60:0:34 1/1:60:0:230 1/1:60:0:59 1/1:60:0:61 1/1:60:0:34 1/1:60:0:230 1/1:60:0:59 1/1:60:0:61 1/1:60:0:34 1/1:60:0:59 1/1:60:0:61	0/0:0:41:0 0/0:0:27:0 0/0:0:10:0 0/0:0:7:0 NA NA NA NA 0/0:0:41:0 0/0:0:27:0 0/0:0:10:0 0/0:0:7:0 0/0:0:41:0 0/0:0:10:0 0/0:0:7:0	FALSE
Chr7	5972497	INS	69	snf2_gsc_grch38 snf2_ont_grch38 snf2_pbr_grch38 snf2_vai_grch38 serv_gsc_grch38 serv_ont_grch38 serv_pbr_grch38 serv_vai_grch38 nmsv_gsc_grch38 nmsv_ont_grch38 nmsv_pbr_grch38 nmsv_vai_grch38 cutesv_gsc_grch38 cutesv_pbr_grch38 cutesv_vai_grch38	0/1:60:23:28 0/1:60:53:47 0/1:54:27:13 0/1:60:21:18 0/1:60:23:28 0/1:60:53:47 0/1:54:27:13 0/1:60:21:18 0/1:60:23:28 0/1:60:53:47 0/1:54:27:13 0/1:60:21:18 0/1:60:23:28 0/1:54:27:13 0/1:60:21:18	0/0:0:31:0 0/0:0:26:0 0/0:0:28:0 0/0:0:15:0 NA NA NA NA 0/0:0:31:0 0/0:0:26:0 0/0:0:28:0 0/0:0:15:0 0/0:0:31:0 0/0:0:28:0 0/0:0:15:0	FALSE
Chr7	158339323	DEL	-138	snf2_gsc_grch38 snf2_ont_grch38 snf2_pbr_grch38 snf2_vai_grch38	1/1:60:0:71 0/1:42:42:16 1/1:29:1:14 0/0:15:9:1	0/0:0:20:0:NULL 0/0:0:58:0:NULL 0/0:0:32:0:NULL 0/0:0:23:0:NULL	TRUE	IGV shows smaller event and also seen in control
Chr14	34545584	INS	2501	snf2_gsc_grch38 snf2_ont_grch38 snf2_pbr_grch38 snf2_vai_grch38 serv_gsc_grch38 serv_ont_grch38 serv_pbr_grch38 serv_vai_grch38 nmsv_gsc_grch38 nmsv_ont_grch38 nmsv_pbr_grch38 nmsv_vai_grch38 cutesv_gsc_grch38 cutesv_pbr_grch38 cutesv_vai_grch38	1/1:60:0:38 1/1:60:1:28 1/1:11:0:4 1/1:55:0:20 1/1:60:0:38 1/1:60:1:28 1/1:11:0:4 1/1:55:0:20 1/1:60:0:38 1/1:60:1:28 1/1:11:0:4 1/1:55:0:20 1/1:60:0:38 1/1:11:0:4 1/1:55:0:20	0/0:0:58:0 0/0:0:34:0 0/0:0:15:0 0/0:0:11:0 NA NA NA NA 0/0:0:58:0 0/0:0:34:0 0/0:0:15:0 0/0:0:11:0 0/0:0:58:0 0/0:0:15:0 0/0:0:11:0	FALSE
Chr15	23467473	DEL	1419	snf2_gsc_grch38 snf2_ont_grch38 snf2_pbr_grch38 snf2_vai_grch38 serv_gsc_grch38 serv_ont_grch38 serv_pbr_grch38 serv_vai_grch38 nmsv_gsc_grch38 nmsv_ont_grch38 nmsv_pbr_grch38 nmsv_vai_grch38 cutesv_gsc_grch38 cutesv_pbr_grch38 cutesv_vai_grch38	0/0:60:105:21 0/0:60:148:22 0/0:60:89:16 0/0:52:87:19 0/0:60:105:21 0/0:60:148:22 0/0:60:89:16 0/0:52:87:19 0/0:60:105:21 0/0:60:148:22 0/0:60:89:16 0/0:52:87:19 0/0:60:105:21 0/0:60:89:16 0/0:52:87:19	0/0:0:31:0 0/0:0:58:0 0/0:0:88:0 0/0:0:51:0 NA NA NA NA 0/0:0:31:0 0/0:0:58:0 0/0:0:88:0 0/0:0:51:0 0/0:0:31:0 0/0:0:88:0 0/0:0:51:0	FALSE
Chr18	9868620	BND	1	snf2_gsc_grch38 snf2_ont_grch38 snf2_pbr_grch38 snf2_vai_grch38	0/0:60:44:5 0/0:60:66:11 0/0:1:33:9 0/1:14:38:12	0/0:0:28:0 0/0:0:47:0 0/0:0:55:0 0/0:0:43:0	FALSE
Chr19	17286003	BND	1	snf2_gsc_grch38 snf2_ont_grch38 snf2_pbr_grch38 snf2_vai_grch38	0/1:54:45:18 0/1:60:48:25 0/0:11:22:5 0/1:17:26:9	0/0:0:35:0 0/0:0:73:0 0/0:0:25:0 0/0:0:46:0	FALSE

## Sheet: SuppTable5 COLO829-hg38 FN anal
Supplementary Table 5: False Negative analysis COLO829-hg38
#CHROM	POS	SVTYPE	SVLEN	ID	Evidence Cancer samples	Evidence Blood controls	is FN (adjusted)	Reason missed	IGV BND: ID|CHR1|CHR2|VAF|DV|DR+DV (MQ20+)
Chr1	86871328	BND	1	truthset_1_1	NA	None	FALSE	Force calling showed no evidence to support the call. VAF too low to be considerede (VAF ~ 2%)	GSC_COLO829_HG38 | chr1:86871328-86871329 | chr10,35830199 | 1.72% | 1 | 58 ONT_COLO829_HG38 | chr1:86871328-86871329 | chr10,35830199 | 2.56% | 2 | 78 PBR_COLO829_HG38 | chr1:86871328-86871329 | chr10,35830199 | 0.0% | 0 | 64 VAI_COLO829_HG38 | chr1:86871328-86871329 | chr10,35830199 | 1.79% | 1 | 56
Chr3	25359111	BND	1	truthset_7_1	NA	None	LOWAF	Force calling showed no evidence to support the call. VAF too low to be considered (VAF 2-7%) One sample show no evidence	GSC_COLO829_HG38 | chr3:25359111-25359112 | chr12,72273112 | 4.78% | 28 | 586 ONT_COLO829_HG38 | chr3:25359111-25359112 | chr12,72273112 | 7.15% | 49 | 685 PBR_COLO829_HG38 | chr3:25359111-25359112 | chr12,72273112 | 0.0% | 0 | 498 VAI_COLO829_HG38 | chr3:25359111-25359112 | chr12,72273112 | 1.88% | 8 | 426
Chr3	25359568	BND	1	truthset_8_1	NA	None	FALSE	Force calling showed no evidence to support the call. VAF too low to be considerede (VAF 3-5%). One sample show no evidence	GSC_COLO829_HG38 | chr3:25359568-25359569 | chr10,58717464 | 2.8% | 15 | 536 ONT_COLO829_HG38 | chr3:25359568-25359569 | chr10,58717464 | 4.54% | 28 | 617 PBR_COLO829_HG38 | chr3:25359568-25359569 | chr10,58717464 | 0.0% | 0 | 463 VAI_COLO829_HG38 | chr3:25359568-25359569 | chr10,58717464 | 3.02% | 12 | 397
Chr3	26390427	BND	1	truthset_9_1	NA	None	MOSAIC	Force calling showed no evidence to support the call. VAF too low to be considerede in two samples (VAF 5-6%)	GSC_COLO829_HG38 | chr3:26390427-26390428 | chr6,26193813 | 10.48% | 26 | 248 ONT_COLO829_HG38 | chr3:26390427-26390428 | chr6,26193813 | 16.02% | 58 | 362 PBR_COLO829_HG38 | chr3:26390427-26390428 | chr6,26193813 | 6.2% | 15 | 242 VAI_COLO829_HG38 | chr3:26390427-26390428 | chr6,26193813 | 5.5% | 12 | 218
Chr3	60886452	DEL	141091	truthset_12_1	GSC_COLO829_38 (0/1 VAF=38.81%) ONT_COLO829_38 (0/1 VAF=35.79%) PBR_COLO829_38 (0/1 VAF=41.54%) VAI_COLO829_38 (0/1 VAF=28.81%)	None	TRUE	Force calling resulted in a HET genotype in all cancer samples
Chr3	186724386	DEL	71459	truthset_13_1	GSC_COLO829_38 (0/0 VAF=2.08%) ONT_COLO829_38 (NULL) PBR_COLO829_38 (NULL) VAI_COLO829_38 (0/0 VAF=4.55%)	None	LOWAF	Force calling showed VAF too low to be considerede (VAF ~ 2-5%). Two sample show no evidence
Chr6	26193889	INV	289	truthset_18_1	None	None	FALSE	Force calling showed no evidence of the SV, looks like a duplication
Chr6	138452922	BND	1	truthset_19_1	NA	None	FALSE	Force calling showed not enough evidence to support the call. IGV shows no samples supporting the call	GSC_COLO829_HG38 | chr6:138452922-138452923 | chr15,23472019 | 0.0% | 0 | 150 ONT_COLO829_HG38 | chr6:138452922-138452923 | chr15,23472019 | 0.0% | 0 | 155 PBR_COLO829_HG38 | chr6:138452922-138452923 | chr15,23472019 | 0.0% | 0 | 118 VAI_COLO829_HG38 | chr6:138452922-138452923 | chr15,23472019 | 0.0% | 0 | 107
Chr6	138453044	BND	1	truthset_20_1	NA	None	FALSE	Force calling showed not enough evidence to support the call. IGV shows no samples supporting the call	GSC_COLO829_HG38 | chr6:138453044-138453045 | chr15,23467470 | 0.0% | 0 | 150 ONT_COLO829_HG38 | chr6:138453044-138453045 | chr15,23467470 | 0.0% | 0 | 154 PBR_COLO829_HG38 | chr6:138453044-138453045 | chr15,23467470 | 0.0% | 0 | 118 VAI_COLO829_HG38 | chr6:138453044-138453045 | chr15,23467470 | 0.0% | 0 | 106
Chr7	78352522	DEL	100409	truthset_23_1	GSC_COLO829_38 (0/1 VAF=41.89%) ONT_COLO829_38 (0/1 VAF=31.40%) PBR_COLO829_38 (0/1 VAF=31.65%) VAI_COLO829_38 (0/1 VAF=29.69%)	None	TRUE	Force calling resulted in a HET genotype in all cancer samples
Chr8	111050191	DEL	1163	truthset_32_1	GSC_COLO829_38 (0/0 VAF=3.61%) ONT_COLO829_38 (0/0 VAF=2.94%) PBR_COLO829_38 (0/0 VAF=2.86%) VAI_COLO829_38 (0/0 VAF=6.15%)	None	LOWAF	Force calling showed not enough evidence to support the call. VAF too low to be considered (VAF 3-6%). Additionally, SUPPORT_MIN filter removed the call
Chr10	7017550	BND	1	truthset_38_1	NA	None	LOWAF	Not enough evidence to support the SV. Only onse sample has HET genotype. VAF too low to be considered in the rest of the samples (1-4%).	NA ONT_COLO829_HG38 | chr10:7017550-7017551 | chr19,17286001 | 4.17% | 4 | 96 PBR_COLO829_HG38 | chr10:7017550-7017551 | chr19,17286001 | 1.39% | 1 | 72 VAI_COLO829_HG38 | chr10:7017550-7017551 | chr19,17286001 | 3.45% | 2 | 58
Chr10	33097525	DEL	2732610	truthset_41_1	GSC_COLO829_38 (NULL) ONT_COLO829_38 (0/0 VAF=4.92%) PBR_COLO829_38 (NULL) VAI_COLO829_38 (NULL)	None	LOWAF	Force calling showed not enough evidence to support the call. VAF too low to be considered (VAF ~5%) in one sample an no evidence in three samples. Additionally, COV_CHANGE and SUPPORT_MIN filters removed the call
Chr10	53716587	DEL	549	truthset_42_1	GSC_COLO829_38 (0/0 VAF=3.77%) ONT_COLO829_38 (0/0 VAF=1.92%) PBR_COLO829_38 (NULL) VAI_COLO829_38 (0/0 VAF=15.79%)	None	LOWAF	Force calling showed not enough evidence to support the SV. VAF too low to be considered (VAF 2-3%) in two sample an no evidence in one sample. SUPPORT_MIN and GT filters removed the call
Chr10	58717662	BND	1	truthset_43_1	NA	None	LIKELY	One sample show no evidence of the SV.	GSC_COLO829_HG38 | chr10:58717662-58717663 | chr12,72273295 | 19.77% | 17 | 86 ONT_COLO829_HG38 | chr10:58717662-58717663 | chr12,72273295 | 23.33% | 28 | 120 PBR_COLO829_HG38 | chr10:58717662-58717663 | chr12,72273295 | 0.0% | 0 | 41 VAI_COLO829_HG38 | chr10:58717662-58717663 | chr12,72273295 | 15.28% | 11 | 72
Chr10	81882050	DEL	185860	truthset_44_1	GSC_COLO829_38 (0/1 VAF=26.32%) ONT_COLO829_38 (0/0 VAF=7.41%) PBR_COLO829_38 (0/0 VAF=8.16%) VAI_COLO829_38 (0/0 VAF=12.20%)	None	TRUE	Not enough evidence to support the SV. VAF too low to be considered (VAF 7-8%) in two sample. COV_CHANGE filter removed the call
Chr14	104093751	DEL	55	truthset_50_1	GSC_COLO829_38 (1/1:60:0:87) ONT_COLO829_38 (1/1:60:0:92) PBR_COLO829_38 (1/1:55:0:20) VAI_COLO829_38 (1/1:60:0:48)	GSC_COLO829BL_38 (0/0:0:31:0) ONT_COLO829BL_38 (0/0:0:66:0) PBR_COLO829BL_38 (0/0:0:16:0) VAI_COLO829BL_38 (0/0:60:43:1)	FIXED	Present in one of the control samples (one read in Valle-Inclan et al)
Chr14	105867667	INS	100	truthset_51_1	None	None	FALSE	Force calling showed no evidence to support the call
Chr15	23461732	BND	1	truthset_53_1	NA	None	LOWAF	Force calling showed no evidence to support the SV. VAF too low to be considered (VAF 2~5%) in three sample an no evidence in one samples.	GSC_COLO829_HG38 | chr15:23461732-23461733 | chr20,38646024 | 3.73% | 6 | 161 ONT_COLO829_HG38 | chr15:23461732-23461733 | chr20,38646024 | 4.5% | 10 | 222 PBR_COLO829_HG38 | chr15:23461732-23461733 | chr20,38646024 | 0.0% | 0 | 118 VAI_COLO829_HG38 | chr15:23461732-23461733 | chr20,38646024 | 2.38% | 3 | 126
Chr15	41329096	DUP	7212	truthset_55_1	DUP 0/0:60:40:1 0/0:0:62:0 0/1:60:23:19 0/0:60:41:4 INS 0/0:60:74:3 0/0:60:69:10 0/0:48:46:8 0/1:60:17:13	None	TRUE	No evidence of the DUP in all cancer samples. Sniffles2 called it a duplications and three distinct INS events. Two samples as HET SV and one low-frequency. IGV shows the event

## Sheet: SuppTable6 CentroTelomere SV co
Supplementary Table 6: Comparison of Centromeric and telomeric SV calls in CHM13-T2T abd GRCh38
Contig	CHM13-T2T			GRCh38			Difference in proportion
	Total SVs	SVs overlapping centromere+telomere*	Proportion SVs overlapping centromere+telomere*	Total SVs	SVs overlapping centromere+telomere*	Proportion SVs overlapping centromere+telomere*
Chr1	4146	1560	37.63	2143	413	19.27	18.36% more SVs in CHM13-T2T	1	0	18.36
Chr2	3800	957	25.18	2049	555	27.09	1.91% more SVs in GRCh38	0	1	1.91
Chr3	2578	740	28.7	1396	131	9.38	19.32% more SVs in CHM13-T2T	1	0	19.32
Chr4	3226	1156	35.83	1705	447	26.22	9.61% more SVs in CHM13-T2T	1	0	9.61
Chr5	2766	987	35.68	1665	578	34.71	0.97% more SVs in CHM13-T2T	1	0	0.97
Chr6	2597	580	22.33	1554	367	23.62	1.29% more SVs in GRCh38	0	1	1.29
Chr7	2956	805	27.23	1781	479	26.9	0.33% more SVs in CHM13-T2T	1	0	0.33
Chr8	2231	645	28.91	1259	283	22.48	6.43% more SVs in CHM13-T2T	1	0	6.43
Chr9	4745	3043	64.13	1350	293	21.7	42.43% more SVs in CHM13-T2T	1	0	42.43
Chr10	2560	1038	40.55	1568	567	36.16	4.39% more SVs in CHM13-T2T	1	0	4.39
Chr11	2036	459	22.54	1265	293	23.16	0.62% more SVs in GRCh38	0	1	0.62
Chr12	2500	852	34.08	1277	319	24.98	9.1% more SVs in CHM13-T2T	1	0	9.1
Chr13	2520	1336	53.02	1074	376	35.01	18.01% more SVs in CHM13-T2T	1	0	18.01
Chr14	2143	1156	53.94	708	53	7.49	46.45% more SVs in CHM13-T2T	1	0	46.45
Chr15	1832	831	45.36	871	192	22.04	23.32% more SVs in CHM13-T2T	1	0	23.32
Chr16	2351	1182	50.28	1058	325	30.72	19.56% more SVs in CHM13-T2T	1	0	19.56
Chr17	1998	734	36.74	1171	441	37.66	0.92% more SVs in GRCh38	0	1	0.92
Chr18	1797	926	51.53	969	451	46.54	4.99% more SVs in CHM13-T2T	1	0	4.99
Chr19	2160	917	42.45	989	192	19.41	23.04% more SVs in CHM13-T2T	1	0	23.04
Chr20	2144	502	23.41	1207	300	24.86	1.45% more SVs in GRCh38	0	1	1.45
Chr21	1585	1019	64.29	831	495	59.57	4.72% more SVs in CHM13-T2T	1	0	4.72
Chr22	2314	1457	62.96	783	246	31.42	31.54% more SVs in CHM13-T2T	1	0	31.54
ChrX	1614	503	31.16	1200	426	35.5	4.34% more SVs in GRCh38	0	1	4.34
ChrY	909	735	80.86	652	463	71.01	9.85% more SVs in CHM13-T2T	1	0	9.85
								18	6
* Coordinates are based on NCBI genome comparison tool								16.2456	1.755

## Sheet: SuppTable7 COLO829-T2T cancer S
Supplementary Table 7A: COLO829-T2T summary
SVTYPE	Sniffles strategy		Multi-tool strategy
	COUNT	PROPORTION	COUNT	PROPORTION
INS	16049	0.407294	12420	0.38152
DEL	23170	0.588011	19740	0.606377
DUP	44	0.00111664	155	0.00476132
INV	58	0.00147193	238	0.00731093
BND	83	0.00210639	1	3.07182e-05
TOTAL	39404	1	32554	1
Supplementary Table 7B: COLO829-T2T benchmark
#CHROM	START	END	SVTYPE	SVLEN	ID	SUPPORT	Impacted genetic element	Annotation
Chr1	207054645	207088229	DEL	-33584	COLO829_SOMATIC_SV_1_DEL	mtool_colo829_gsc_t2t|0/1|0.315,mtool_colo829_ont_t2t|0/1|0.365, mtool_colo829_pbr_t2t|0/1|0.295,mtool_colo829_vai_t2t|0/1|0.31	MIR29B2CHG	Breast cancer associated *Unique to CHM13-T2T
Chr1	223647745	223801234	DUP	153489	COLO829_SOMATIC_SV_2_DUP	snf2_colo829_gsc_t2t|0/1|0.348:75,snf2_colo829_ont_t2t|0/1|0.368:117, snf2_colo829_pbr_t2t|0/1|0.379:59,snf2_colo829_vai_t2t|0/1|0.227:75	CNIH3; CNIH3-AS2	Predicted association; *Unique to CHM13-T2T
Chr1	223783923	223787143	DEL	-3220	COLO829_SOMATIC_SV_3_DEL	mtool_colo829_gsc_t2t|0/1|0.365,mtool_colo829_ont_t2t|0/1|0.33, mtool_colo829_pbr_t2t|0/1|0.409,mtool_colo829_vai_t2t|0/1|0.327	CNIH3	Predicted association
Chr2	45420200	45420200	INS	57	COLO829_SOMATIC_SV_4_INS	snf2_colo829_gsc_t2t|0/1|0.309:47,snf2_colo829_ont_t2t|0/1|0.485:52, snf2_colo829_pbr_t2t|0/1|0.507:35,snf2_colo829_vai_t2t|0/0|0.092:59	SRBD1	Breast cancer associated *Unique to CHM13-T2T
Chr3	24528015	24529088	INV	1073	COLO829_SOMATIC_SV_5_INV	mtool_colo829_gsc_t2t|0/1|0.54,mtool_colo829_ont_t2t|0/1|0.465, mtool_colo829_pbr_t2t|0/1|0.536,mtool_colo829_vai_t2t|0/1|0.482	None
Chr3	26625027	26625604	INV	577	COLO829_SOMATIC_SV_6_INV	mtool_colo829_gsc_t2t|0/1|0.393,mtool_colo829_ont_t2t|0/1|0.392, mtool_colo829_pbr_t2t|0/1|0.387,mtool_colo829_vai_t2t|0/1|0.397	LRRC3B	Tumor supressor
Chr3	60188788	60260597	DEL	-71809	COLO829_SOMATIC_SV_7_DEL	snf2_colo829_gsc_t2t|0/1|0.292:46,snf2_colo829_ont_t2t|0/1|0.304:64, snf2_colo829_pbr_t2t|0/1|0.391:42,snf2_colo829_vai_t2t|0/1|0.259:40	FHIT	Fragile, likned to cancer
Chr4	68783146	68783146	INS	83	COLO829_SOMATIC_SV_8_INS	snf2_colo829_gsc_t2t|0/1|0.517:43,snf2_colo829_ont_t2t|0/1|0.479:61, snf2_colo829_pbr_t2t|0/1|0.5:53,snf2_colo829_vai_t2t|0/1|0.553:34	EPHA5	Cancer related
Chr4	190421537	190421537	INS	61	COLO829_SOMATIC_SV_9_INS	snf2_colo829_gsc_t2t|0/1|0.466:47,snf2_colo829_ont_t2t|0/1|0.433:68, snf2_colo829_pbr_t2t|0/1|0.474:50,snf2_colo829_vai_t2t|0/1|0.389:44	None
Chr5	28893440	29068217	DEL	-174777	COLO829_SOMATIC_SV_10_DEL	snf2_colo829_gsc_t2t|1/1|1.0:0,snf2_colo829_ont_t2t|1/1|1.0:0, snf2_colo829_pbr_t2t|0/1|0.739:6,snf2_colo829_vai_t2t|1/1|1.0:0	LSP1P3	NA *Unique to CHM13-T2T
Chr7	6090247	6090247	INS	71	COLO829_SOMATIC_SV_11_INS	mtool_colo829_gsc_t2t|0/1|0.392,mtool_colo829_ont_t2t|0/1|0.36, mtool_colo829_pbr_t2t|0/0|0.15,mtool_colo829_vai_t2t|0/1|0.457	PMS2	DNA repair
Chr7	57647405	57679949	DEL	-32544	COLO829_SOMATIC_SV_12_DEL	mtool_colo829_gsc_t2t|0/1|0.735,mtool_colo829_ont_t2t|1/1|0.79, mtool_colo829_pbr_t2t|1/1|0.871,mtool_colo829_vai_t2t|0/1|0.659	MIR3147HG	NA *Unique to CHM13-T2T
Chr7	79812785	79880290	DEL	-67505	COLO829_SOMATIC_SV_13_DEL	snf2_colo829_gsc_t2t|0/1|0.357:45,snf2_colo829_ont_t2t|0/1|0.286:75, snf2_colo829_pbr_t2t|0/1|0.5:30,snf2_colo829_vai_t2t|0/0|0.214:44	MAGI2	Prostaste cancer associated
Chr7	87465291	87474327	DUP	9036	COLO829_SOMATIC_SV_14_DUP	mtool_colo829_gsc_t2t|0/0|0.214,mtool_colo829_ont_t2t|0/0|0.108, mtool_colo829_pbr_t2t|0/0|0.21,mtool_colo829_vai_t2t|0/0|0.141	None
Chr7	106159457	106286571	DUP	127114	COLO829_SOMATIC_SV_15_DUP	snf2_colo829_gsc_t2t|0/1|0.409:78,snf2_colo829_ont_t2t|0/1|0.406:104, snf2_colo829_pbr_t2t|0/1|0.356:65,snf2_colo829_vai_t2t|0/1|0.387:65	LHFPL3	Tumor supressor
Chr7	112071598	112072726	DEL	-1128	COLO829_SOMATIC_SV_16_DEL	mtool_colo829_gsc_t2t|0/1|0.223,mtool_colo829_ont_t2t|0/1|0.26, mtool_colo829_pbr_t2t|0/1|0.236,mtool_colo829_vai_t2t|0/1|0.261	IMMP2L	Tumor supressor
Chr7	127423314	127838662	DEL	-415348	COLO829_SOMATIC_SV_17_DEL	snf2_colo829_gsc_t2t|0/1|0.776:13,snf2_colo829_ont_t2t|1/1|0.838:12, snf2_colo829_pbr_t2t|0/1|0.698:19,snf2_colo829_vai_t2t|0/1|0.412:30	GRM8	Lung cancer associated
Chr7	127770165	127839202	INV	69037	COLO829_SOMATIC_SV_18_INV	snf2_colo829_gsc_t2t|0/1|0.451:62,snf2_colo829_ont_t2t|0/1|0.445:81, snf2_colo829_pbr_t2t|0/1|0.392:79,snf2_colo829_vai_t2t|0/1|0.427:55	GRM8	Lung cancer associated
Chr7	145490433	145493444	DEL	-3011	COLO829_SOMATIC_SV_19_DEL	mtool_colo829_gsc_t2t|0/0|0.207,mtool_colo829_ont_t2t|0/1|0.233, mtool_colo829_pbr_t2t|0/1|0.238,mtool_colo829_vai_t2t|0/0|0.123	None
Chr7	152222659	N[chr15:82007918[	BND	NA	COLO829_SOMATIC_SV_20_BND	snf2_colo829_gsc_t2t|0/1|0.66:17,snf2_colo829_ont_t2t|0/1|0.636:20, snf2_colo829_pbr_t2t|1/1|0.812:3,snf2_colo829_vai_t2t|0/1|0.605:15	ASIC3	Pancreatic cancer associated
Chr8	131362526	131389035	DUP	26509	COLO829_SOMATIC_SV_21_DUP	mtool_colo829_gsc_t2t|0/0|0.19,mtool_colo829_ont_t2t|0/0|0.112, mtool_colo829_pbr_t2t|None,mtool_colo829_vai_t2t|0/0|0.12	ASAP1	Gastric and breast cancer. Tumor progression, chemo resistance and progression
Chr9	28042441	28069724	INV	27283	COLO829_SOMATIC_SV_22_INV	mtool_colo829_gsc_t2t|0/1|0.561,mtool_colo829_ont_t2t|0/1|0.581, mtool_colo829_pbr_t2t|0/1|0.489,mtool_colo829_vai_t2t|0/1|0.475	LINGO2	Cancer related
Chr9	28042469	28045073	INV	2604	COLO829_SOMATIC_SV_23_INV	mtool_colo829_gsc_t2t|0/1|0.418,mtool_colo829_ont_t2t|0/1|0.394, mtool_colo829_pbr_t2t|0/1|0.37,mtool_colo829_vai_t2t|0/1|0.4	LINGO2	Cancer related
Chr9	28044906	28168301	DEL	-123395	COLO829_SOMATIC_SV_24_DEL	snf2_colo829_gsc_t2t|1/1|0.947:1,snf2_colo829_ont_t2t|1/1|1.0:0, snf2_colo829_pbr_t2t|1/1|0.808:5,snf2_colo829_vai_t2t|1/1|1.0:0	LINGO2	Cancer related
Chr10	7090725	N[chr19:17421718[	BND	NA	COLO829_SOMATIC_SV_25_BND	snf2_colo829_gsc_t2t|0/1|0.436:22,snf2_colo829_ont_t2t|0/1|0.328:43, snf2_colo829_pbr_t2t|0/1|0.263:28,snf2_colo829_vai_t2t|0/1|0.25:30	ANKLE1	Cancer related
Chr10	7593332	N]chr18:10032089]	BND	NA	COLO829_SOMATIC_SV_26_BND	snf2_colo829_gsc_t2t|0/0|0.105:51,snf2_colo829_ont_t2t|0/0|0.163:67, snf2_colo829_pbr_t2t|0/1|0.25:36,snf2_colo829_vai_t2t|0/1|0.22:39	ITIH5	Tumor supressor
Chr10	88824445	88836272	DEL	-11827	COLO829_SOMATIC_SV_27_DEL	mtool_colo829_gsc_t2t|1/1|1.0,mtool_colo829_ont_t2t|1/1|0.8, mtool_colo829_pbr_t2t|1/1|1.0,mtool_colo829_vai_t2t|1/1|1.0	PTEN	Tumor supressor
Chr11	81009356	81317577	DEL	-308221	COLO829_SOMATIC_SV_28_DEL	snf2_colo829_gsc_t2t|0/1|0.625:15,snf2_colo829_ont_t2t|1/1|0.833:7, snf2_colo829_pbr_t2t|0/1|0.579:16,snf2_colo829_vai_t2t|1/1|0.793:6	None
Chr12	36018420	36019777	DEL	-1357	COLO829_SOMATIC_SV_29_DEL	mtool_colo829_gsc_t2t|0/1|0.387,mtool_colo829_ont_t2t|0/1|0.368, mtool_colo829_pbr_t2t|0/1|0.462,mtool_colo829_vai_t2t|0/1|0.571	Centromere
Chr12	129318482	129318482	INS	352	COLO829_SOMATIC_SV_30_INS	mtool_colo829_gsc_t2t|0/1|0.724,mtool_colo829_ont_t2t|0/1|0.633, mtool_colo829_pbr_t2t|0/1|0.645,mtool_colo829_vai_t2t|0/1|0.725	TMEM132D	Ovarian cancer associated		1
Chr14	66753567	66753567	INS	98	COLO829_SOMATIC_SV_31_INS	mtool_colo829_gsc_t2t|1/1|1.0,mtool_colo829_ont_t2t|1/1|0.981, mtool_colo829_pbr_t2t|1/1|1.0,mtool_colo829_vai_t2t|1/1|1.0	RGS6	Regulates cancer risk		1
Chr14	100139043	100139043	INS	197	COLO829_SOMATIC_SV_32_INS	snf2_colo829_gsc_t2t|1/1|1.0:0,snf2_colo829_ont_t2t|1/1|1.0:0, snf2_colo829_pbr_t2t|1/1|0.974:1,snf2_colo829_vai_t2t|1/1|0.984:1	None			1
Chr15	21173739	21195013	INV	21274	COLO829_SOMATIC_SV_33_INV	mtool_colo829_gsc_t2t|None,mtool_colo829_ont_t2t|None, mtool_colo829_pbr_t2t|0/0|0.183,mtool_colo829_vai_t2t|0/0|0.129	GOLGA6L2			1
Chr15	21201162	21202580	DEL	-1418	COLO829_SOMATIC_SV_34_DEL	mtool_colo829_gsc_t2t|0/0|0.168,mtool_colo829_ont_t2t|0/0|0.129, mtool_colo829_pbr_t2t|0/0|0.151,mtool_colo829_vai_t2t|0/0|0.179	None			1
Chr15	21320937	21482062	INV	161125	COLO829_SOMATIC_SV_35_INV	snf2_colo829_gsc_t2t|0/1|0.381:70,snf2_colo829_ont_t2t|0/1|0.437:89, snf2_colo829_pbr_t2t|0/1|0.404:68,snf2_colo829_vai_t2t|0/1|0.33:59	MAGEL2; NDN	Prader-Willi syndrome *Unique to CHM13-T2T		1
Chr16	64386219	64421937	DEL	-35718	COLO829_SOMATIC_SV_36_DEL	mtool_colo829_gsc_t2t|1/1|1.0,mtool_colo829_ont_t2t|1/1|1.0, mtool_colo829_pbr_t2t|1/1|1.0,mtool_colo829_vai_t2t|1/1|1.0	CNOT1			1
Chr16	84950986	85117376	DEL	166390	COLO829_SOMATIC_SV_37_DEL	snf2_colo829_gsc_t2t|0/1|0.652:8,snf2_colo829_ont_t2t|1/1|1.0:0, snf2_colo829_pbr_t2t|1/1|0.833:4,snf2_colo829_vai_t2t|1/1|1.0:0	WWOX	Tumor suppressor		1
Chr18	10032090	N]chr10:7593331]	BND	NA	COLO829_SOMATIC_SV_38_BND	snf2_colo829_gsc_t2t|0/0|0.1:45,snf2_colo829_ont_t2t|0/0|0.143:66, snf2_colo829_pbr_t2t|0/0|0.214:33,snf2_colo829_vai_t2t|0/1|0.235:39	ITIH5	Tumor supressor		1
Chr18	68928344	68931709	DEL	-3365	COLO829_SOMATIC_SV_39_DEL	mtool_colo829_gsc_t2t|0/0|0.208,mtool_colo829_ont_t2t|0/1|0.261, mtool_colo829_pbr_t2t|0/1|0.218,mtool_colo829_vai_t2t|0/0|0.185	TMX3	Cell proliferation		1
Chr19	17420891	N[chr10:7017345[	BND	NA	COLO829_SOMATIC_SV_40_BND	snf2_colo829_gsc_t2t|0/1|0.327:37,snf2_colo829_ont_t2t|0/1|0.403:37, snf2_colo829_pbr_t2t|0/0|0.217:18,snf2_colo829_vai_t2t|0/1|0.3:21	ANKLE1	Cancer related		1
Chr20	13223436	13226808	DEL	-3372	COLO829_SOMATIC_SV_41_DEL	mtool_colo829_gsc_t2t|0/1|0.538,mtool_colo829_ont_t2t|0/1|0.516, mtool_colo829_pbr_t2t|0/1|0.469,mtool_colo829_vai_t2t|0/1|0.541	*TASP1	Cancer related *Unique to CHM13-T2T		1
Chr20	15032190	15083224	DEL	-51034	COLO829_SOMATIC_SV_42_DEL	snf2_colo829_gsc_t2t|0/1|0.351:48,snf2_colo829_ont_t2t|0/1|0.31:49, snf2_colo829_pbr_t2t|0/1|0.318:45,snf2_colo829_vai_t2t|0/1|0.37:34	MACROD2	Cervical cancer associated		1
Chr20	15069860	15083116	DEL	-13256	COLO829_SOMATIC_SV_43_DEL	mtool_colo829_gsc_t2t|0/1|0.448,mtool_colo829_ont_t2t|0/1|0.233, mtool_colo829_pbr_t2t|0/1|0.431,mtool_colo829_vai_t2t|0/1|0.314	MACROD2	Cervical cancer associated		1
Chr20	29423649	29425527	DEL	-1878	COLO829_SOMATIC_SV_44_DEL	mtool_colo829_gsc_t2t|0/0|0.1,mtool_colo829_ont_t2t|0/0|0.102, mtool_colo829_pbr_t2t|0/1|0.273,mtool_colo829_vai_t2t|None,	None			1
ChrX	30776949	30796157	DEL	-19208	COLO829_SOMATIC_SV_45_DEL	mtool_colo829_gsc_t2t|0/1|0.679,mtool_colo829_ont_t2t|0/1|0.7, mtool_colo829_pbr_t2t|0/1|0.595,mtool_colo829_vai_t2t|0/1|0.606	DMD	Cervical cancer associated		1
ChrX	30881207	31618866	DEL	-737659	COLO829_SOMATIC_SV_46_DEL	snf2_colo829_gsc_t2t|1/1|1.0:0,snf2_colo829_ont_t2t|1/1|1.0:0, snf2_colo829_pbr_t2t|1/1|1.0:0,snf2_colo829_vai_t2t|1/1|1.0:0	DMD	Cervical cancer associated		1
ChrX	31657969	31873135	DEL	-215166	COLO829_SOMATIC_SV_47_DEL	snf2_colo829_gsc_t2t|1/1|0.889:3,snf2_colo829_ont_t2t|1/1|0.833:4, snf2_colo829_pbr_t2t|1/1|1.0:0,snf2_colo829_vai_t2t|0/1|0.7:6	DMD	Cervical cancer associated		1
ChrX	31678649	31781333	DEL	-102684	COLO829_SOMATIC_SV_48_DEL	snf2_colo829_gsc_t2t|1/1|1.0:0,snf2_colo829_ont_t2t|1/1|1.0:0, snf2_colo829_pbr_t2t|1/1|1.0:0,snf2_colo829_vai_t2t|1/1|1.0:0	DMD	Cervical cancer associated		1
ChrX	33639783	33642627	DEL	-2844	COLO829_SOMATIC_SV_49_DEL	mtool_colo829_gsc_t2t|1/1|0.915,mtool_colo829_ont_t2t|1/1|1.0, mtool_colo829_pbr_t2t|1/1|1.0,mtool_colo829_vai_t2t|1/1|0.969	None			1

## Sheet: SuppTable8 COLO829-T2T benchmar
Supplementary Table 8: COLO829-T2T benchamrk
CHM13-T2T						Initial classification			Lifted (by reads)				Benchmark
#CHROM	START	END	SVTYPE	SVLEN	ID	TP	FP	FN	#CHROM	START	SVTYPE	SVLEN	ID	Notes
						0	0	n/a	chr1	86871328	BND	1	truthset_1_1
Chr1	207054645	207088229	DEL	-33584	COLO829_SOMATIC_SV_01_DEL	1	0	n/a	chr1	207807886	DEL	33591	truthset_3_1					7
Chr1	223647745	223801234	DUP	153489	COLO829_SOMATIC_SV_02_DUP	1	0	n/a	chr1	224458901	DUP	153517	truthset_4_1					28
Chr1	223783923	223787143	DEL	-3220	COLO829_SOMATIC_SV_03_DEL	1	0	n/a	chr1	224595093	DEL	3239	truthset_5_1					19
Chr2	45420200	45420200	INS	57	COLO829_SOMATIC_SV_04_INS	0	1	n/a						Detectable by Sniffles strategy	Detectable in all samples	snf2_colo829_gsc_t2t|0/1|0.309:47,snf2_colo829_ont_t2t|0/1|0.485:52, snf2_colo829_pbr_t2t|0/1|0.507:35,snf2_colo829_vai_t2t|0/0|0.092:59
Chr3	24528015	24529088	INV	1073	COLO829_SOMATIC_SV_05_INV	1	0	n/a	chr3	24523617	INV	1074	truthset_6_1					1
						0	0	n/a	chr3	25359111	BND	1	truthset_7_1
						0	0	n/a	chr3	25359568	BND	1	truthset_8_1
						0	0	n/a	chr3	26390427	BND	1	truthset_9_1
Chr3	26625027	26625604	INV	577	COLO829_SOMATIC_SV_06_INV	1	0	n/a	chr3	26622431	INV	577	truthset_10_1					0
Chr3	60188788	60260597	DEL	-71809	COLO829_SOMATIC_SV_07_DEL	1	0	n/a	chr3	60147026	DEL	71789	truthset_11_1					-20
						0	0	n/a	chr3	60886452	DEL	141091	truthset_12_1
						0	0	n/a	chr3	186724386	DEL	71459	truthset_13_1
Chr4	68783146	68783146	INS	83	COLO829_SOMATIC_SV_8_INS	1	0	n/a	chr4	65346239	DUP	80	truthset_14_1					-3
Chr4	190421537	190421537	INS	61	COLO829_SOMATIC_SV_9_INS	1	0	n/a	chr4	187075168	DUP	60	truthset_15_1					-1
Chr5	28893440	29068217	DEL	-174777	COLO829_SOMATIC_SV_10_DEL	1	0	n/a	chr5	28787889	DEL	175100	truthset_16_1					323
						0	0	n/a	chr6	26193889	INV	289	truthset_18_1
						0	0	n/a	chr6	138452922	BND	1	truthset_19_1
						0	0	n/a	chr6	138453044	BND	1	truthset_20_1
Chr7	6090247	6090247	INS	71	COLO829_SOMATIC_SV_11_INS	0	1	n/a						Detectable by both strategies	Detectable in all samples/tools	mtool_colo829_gsc_t2t|0/1|0.392,mtool_colo829_ont_t2t|0/1|0.36, mtool_colo829_pbr_t2t|0/0|0.15,mtool_colo829_vai_t2t|0/1|0.457
Chr7	57647405	57679949	DEL	-32544	COLO829_SOMATIC_SV_12_DEL	1	0	n/a	chr7	57403873	DEL	24534	truthset_22_1	IGV visualized size difference				-8010
						0	0	n/a	chr7	78352522	DEL	100409	truthset_23_1
Chr7	79812785	79880290	DEL	-67505	COLO829_SOMATIC_SV_13_DEL	1	0	n/a	chr7	78560889	DEL	67479	truthset_24_1					-26
Chr7	87465291	87474327	DUP	9036	COLO829_SOMATIC_SV_14_DUP	1	0	n/a	chr7	86215352	DUP	9032	truthset_25_1					-4
Chr7	106159457	106286571	DUP	127114	COLO829_SOMATIC_SV_15_DUP	1	0	n/a	chr7	104844621	DUP	127234	truthset_26_1					120
Chr7	112071598	112072726	DEL	-1128	COLO829_SOMATIC_SV_16_DEL	1	0	n/a	chr7	110753276	DEL	1129	truthset_27_1					1
Chr7	127423314	127838662	DEL	-415348	COLO829_SOMATIC_SV_17_DEL	1	0	n/a	chr7	126106071	DEL	420776	truthset_28_1	IGV visualized size difference			example 2a	5428
Chr7	127770165	127839202	INV	69037	COLO829_SOMATIC_SV_18_INV	1	0	n/a	chr7	126458436	INV	68951	truthset_29_1					-86
Chr7	145490433	145493444	DEL	-3011	COLO829_SOMATIC_SV_19_DEL	1	0	n/a	chr7	144262133	DEL	129568	truthset_30_1	IGV visualized size difference				126557
Chr7	152222659	N[chr15:82007918[	BND	1	COLO829_SOMATIC_SV_20_BND	1	0	n/a	chr7	151049570	BND	1	truthset_31_1					0
						0	0	n/a	chr8	111050191	DEL	1163	truthset_32_1
Chr8	131362526	131389035	DUP	26509	COLO829_SOMATIC_SV_21_DUP	1	0	n/a	chr8	130235870	DUP	26531	truthset_33_1					22
Chr9	28042441	28069724	INV	27283	COLO829_SOMATIC_SV_22_INV	1	0	n/a	chr9	28031837	INV	27305	truthset_34_1					22
Chr9	28042469	28045073	INV	2604	COLO829_SOMATIC_SV_23_INV	1	0	n/a	chr9	28031865	INV	2604	truthset_35_1					0
Chr9	28044906	28168301	DEL	-123395	COLO829_SOMATIC_SV_24_DEL	1	0	n/a	chr9	28034301	DEL	123393	truthset_36_1					-2
						0	0	n/a	chr10	7017550	BND	1	truthset_38_1
Chr10	7090725	N[chr19:17421718[	BND	1	COLO829_SOMATIC_SV_25_BND	1	0	n/a	chr10	7090912	BND	1	truthset_39_1					0
Chr10	7593332	N]chr18:10032089]	BND	1	COLO829_SOMATIC_SV_26_BND	1	0	n/a	chr10	7592410	BND	1	truthset_40_1					0
						0	0	n/a	chr10	33097525	DEL	2732610	truthset_41_1
						0	0	n/a	chr10	53716587	DEL	549	truthset_42_1
						0	0	n/a	chr10	58717662	BND	1	truthset_43_1
						0	0	n/a	chr10	81882050	DEL	185860	truthset_44_1
Chr10	88824445	88836272	DEL	-11827	COLO829_SOMATIC_SV_27_DEL	1	0	n/a	chr10	87940542	DEL	12042	truthset_45_1					215
Chr11	81009356	81317577	DEL	-308221	COLO829_SOMATIC_SV_28_DEL	1	0	n/a	chr11	81074557	DEL	308180	truthset_46_1					-41
Chr12	36018420	36019777	DEL	-1357	COLO829_SOMATIC_SV_29_DEL	0	1	n/a						Detectable by the multi-tool strategy	Detectable in all samples/tools	mtool_colo829_gsc_t2t|0/1|0.387,mtool_colo829_ont_t2t|0/1|0.368, mtool_colo829_pbr_t2t|0/1|0.462,mtool_colo829_vai_t2t|0/1|0.571	example 2B
Chr12	129318482	129318482	INS	352	COLO829_SOMATIC_SV_30_INS	1	0	n/a	chr12	129287232	INS	255	truthset_48_1					-97
Chr14	66753567	66753567	INS	98	COLO829_SOMATIC_SV_31_INS	1	0	n/a	chr14	72547941	INS	96	truthset_49_1					-2
Chr14	100139043	100139043	INS	197	COLO829_SOMATIC_SV_32_INS	0	1
						0	0	n/a	chr14	104093751	DEL	55	truthset_50_1
						0	0	n/a	chr14	105867667	INS	100	truthset_51_1
Chr15	21173739	21195013	INV	21274	COLO829_SOMATIC_SV_33_INV	1	0	n/a	chr15	23440461	BND	1	truthset_52_1	Different SVTYPE, match coordinates				-21273
Chr15	21201145	21205714	DEL	4570	COLO829_SOMATIC_SV_34_DEL	0	1	n/a						Detectable by the multi-tool strategy	Detectable in all samples/tools	mtool_colo829_gsc_t2t|0/0|0.168,mtool_colo829_ont_t2t|0/0|0.129, mtool_colo829_pbr_t2t|0/0|0.151,mtool_colo829_vai_t2t|0/0|0.179
						0	0	n/a	chr15	23461732	BND	1	truthset_53_1
Chr15	21320937	21482062	INV	161125	COLO829_SOMATIC_SV_35_INV	1	0	n/a	chr15	23586513	INV	161040	truthset_54_1					-85
						0	0	n/a	chr15	41329096	DUP	7212	truthset_55_1
Chr16	64386219	64421937	DEL	-35718	COLO829_SOMATIC_SV_36_DEL	1	0	n/a	chr16	58590641	DEL	38786	truthset_56_1	IGV visualized size difference				3068
Chr16	84950986	85117376	DEL	166390	COLO829_SOMATIC_SV_37_DEL	1	0	n/a	chr16	78894739	DEL	166371	truthset_57_1					-19
Chr18	10032090	N]chr10:7593331]	BND	1	COLO829_SOMATIC_SV_38_BND	0	1	n/a						Detectable by Sniffles strategy	Detectable in all samples	snf2_colo829_gsc_t2t|0/0|0.1:45,snf2_colo829_ont_t2t|0/0|0.143:66, snf2_colo829_pbr_t2t|0/0|0.214:33,snf2_colo829_vai_t2t|0/1|0.235:39
Chr18	68928344	68931709	DEL	-3365	COLO829_SOMATIC_SV_39_DEL	1	0	n/a	chr18	68712224	DEL	3365	truthset_58_1					0
Chr19	17420891	N[chr10:7017345[	BND	1	COLO829_SOMATIC_SV_40_BND	0	1	n/a						Detectable by Sniffles strategy	Detectable in all samples	snf2_colo829_gsc_t2t|0/1|0.327:37,snf2_colo829_ont_t2t|0/1|0.403:37, snf2_colo829_pbr_t2t|0/0|0.217:18,snf2_colo829_vai_t2t|0/1|0.3:21
Chr20	13223436	13226808	DEL	-3372	COLO829_SOMATIC_SV_41_DEL	1	0	n/a	chr20	13180082	DEL	3374	truthset_59_1					2
Chr20	15032190	15083224	DEL	-51034	COLO829_SOMATIC_SV_42_DEL	1	0	n/a	chr20	14982311	DEL	50991	truthset_60_1					-43
Chr20	15069860	15083116	DEL	-13256	COLO829_SOMATIC_SV_43_DEL	1	0	n/a	chr20	15019977	DEL	13219	truthset_61_1					-37
Chr20	29423649	29425527	DEL	-1878	COLO829_SOMATIC_SV_44_DEL	0	1	n/a						Detectable by the multi-tool strategy	Detectable in three samples/tools	mtool_colo829_gsc_t2t|0/0|0.1,mtool_colo829_ont_t2t|0/0|0.102, mtool_colo829_pbr_t2t|0/1|0.273,mtool_colo829_vai_t2t|None,
						0	0	n/a	chr22	33363263	DEL	79150	truthset_63_1
ChrX	30776949	30796157	DEL	-19208	COLO829_SOMATIC_SV_45_DEL	1	0	n/a	chrX	31178826	DEL	19268	truthset_64_1					60
ChrX	30881207	31618866	DEL	-737659	COLO829_SOMATIC_SV_46_DEL	1	0	n/a	chrX	31283086	DEL	737547	truthset_65_1					-112
ChrX	31657969	31873135	DEL	-215166	COLO829_SOMATIC_SV_47_DEL	1	0	n/a	chrX	32059738	DEL	215242	truthset_66_1					76
ChrX	31678649	31781333	DEL	-102684	COLO829_SOMATIC_SV_48_DEL	1	0	n/a	chrX	32080415	DEL	102719	truthset_67_1					35
ChrX	33639783	33642627	DEL	-2844	COLO829_SOMATIC_SV_49_DEL	1	0	n/a	chrX	34041661	DEL	2927	truthset_68_1					83
						41	8

## Sheet: SuppTable9 COLO829-lifted cance
Supplmentary Table 9A: COLO829-lifted SV summary
SVTYPE	Sniffles strategy		Multi-tool strategy
	COUNT	PROPORTION	COUNT	PROPORTION
INS	16069	0.525114	15435	0.487924
DEL	14288	0.466913	15718	0.49687
DUP	37	0.00120911	328	0.0103686
INV	77	0.00251626	153	0.00483657
BND	130	0.00424823	0	0
TOTAL	30601	1	31634	1
Supplmentary Table 9B: COLO829-lifted somatic-cancer SVs
#CHROM	START	END	SVTYPE	SVLEN	ID	SUPPORT	MAVIS Annotation
Chr1	207807886	207841474	DEL	-33588	COLO829_SOMATIC_SV1_DEL	mtool_colo829_gsc_lifted|0/1|0.297,mtool_colo829_ont_lifted|0/1|0.357, mtool_colo829_pbr_lifted|0/1|0.279,mtool_colo829_vai_lifted|0/1|0.31	None
Chr1	224458901	224612419	DUP	153518	COLO829_SOMATIC_SV2_DUP	snf2_colo829_gsc_lifted|0/0|0.11,snf2_colo829_ont_lifted|0/1|0.36, snf2_colo829_pbr_lifted|0/1|0.38,snf2_colo829_vai_lifted|0/0|0.21	None
Chr1	224595102	224598323	DEL	-3221	COLO829_SOMATIC_SV3_DEL	mtool_colo829_gsc_lifted|0/1|0.299,mtool_colo829_ont_lifted|0/1|0.289, mtool_colo829_pbr_lifted|0/1|0.409,mtool_colo829_vai_lifted|0/1|0.317	None
Chr1	236097142	236097142	INS	11260	COLO829_SOMATIC_SV4_INS	mtool_colo829_gsc_lifted|1/1|1.0,mtool_colo829_ont_lifted|1/1|1.0, mtool_colo829_pbr_lifted|1/1|1.0,mtool_colo829_vai_lifted|1/1|1.0	None
Chr3	24523615	24524688	INV	1073	COLO829_SOMATIC_SV5_INV	mtool_colo829_gsc_lifted|0/1|0.417,mtool_colo829_ont_lifted|0/1|0.374, mtool_colo829_pbr_lifted|0/1|0.396,mtool_colo829_vai_lifted|0/1|0.392	None
Chr3	26622427	26623001	INV	574	COLO829_SOMATIC_SV6_INV	mtool_colo829_gsc_lifted|0/1|0.325,mtool_colo829_ont_lifted|0/1|0.316, mtool_colo829_pbr_lifted|0/1|0.323,mtool_colo829_vai_lifted|0/1|0.33	LRRC3B	Tumor suppressor
Chr3	60147027	60218836	DEL	-71809	COLO829_SOMATIC_SV7_DEL	snf2_colo829_gsc_lifted|0/1|0.26,snf2_colo829_ont_lifted|0/1|0.30, snf2_colo829_pbr_lifted|0/1|0.39,snf2_colo829_vai_lifted|0/1|0.25	FHIT	Fragile, likned to cancer
Chr3	60886452	61027543	DEL	-141091	COLO829_SOMATIC_SV8_DEL	snf2_colo829_gsc_lifted|0/1|0.35,snf2_colo829_ont_lifted|0/1|0.29, snf2_colo829_pbr_lifted|0/1|0.42,snf2_colo829_vai_lifted|0/1|0.28
Chr4	65346239	65346319	DUP	80	COLO829_SOMATIC_SV9_DUP	snf2_colo829_gsc_lifted|0/1|0.50,snf2_colo829_ont_lifted|0/1|0.48, snf2_colo829_pbr_lifted|0/1|0.50,snf2_colo829_vai_lifted|0/1|0.56
Chr4	187075166	187075166	INS	62	COLO829_SOMATIC_SV10_INS	mtool_colo829_gsc_lifted|0/1|0.451,mtool_colo829_ont_lifted|0/1|0.423, mtool_colo829_pbr_lifted|0/1|0.474,mtool_colo829_vai_lifted|0/1|0.373
Chr5	28787890	28962989	DEL	-175099	COLO829_SOMATIC_SV11_DEL	snf2_colo829_gsc_lifted|1/1|1.00,snf2_colo829_ont_lifted|1/1|1.00, snf2_colo829_pbr_lifted|0/1|0.74,snf2_colo829_vai_lifted|1/1|1.00	None
Chr7	57403872	57436401	DEL	-32529	COLO829_SOMATIC_SV12_DEL	mtool_colo829_gsc_lifted|0/1|0.673,mtool_colo829_ont_lifted|0/1|0.762, mtool_colo829_pbr_lifted|1/1|0.871,mtool_colo829_vai_lifted|0/1|0.628	None
Chr7	75595250	75595250	INS	54	COLO829_SOMATIC_SV13_INS	snf2_colo829_gsc_lifted|0/1|0.34,snf2_colo829_ont_lifted|0/0|0.10, snf2_colo829_pbr_lifted|0/1|0.55,snf2_colo829_vai_lifted|0/1|0.22	HIP1 (Manual inspection added)	Cancer related
Chr7	78352523	78452932	DEL	-100409	COLO829_SOMATIC_SV14_DEL	snf2_colo829_gsc_lifted|0/1|0.36,snf2_colo829_ont_lifted|0/1|0.26, snf2_colo829_pbr_lifted|0/1|0.30,snf2_colo829_vai_lifted|0/1|0.26	MAGI2	Prostaste cancer associated
Chr7	78560891	78628371	DEL	-67480	COLO829_SOMATIC_SV15_DEL	snf2_colo829_gsc_lifted|0/1|0.31,snf2_colo829_ont_lifted|0/1|0.25, snf2_colo829_pbr_lifted|0/1|0.50,snf2_colo829_vai_lifted|0/0|0.20	MAGI2	Prostaste cancer associated
Chr7	86215351	86224384	DUP	9033	COLO829_SOMATIC_SV16_DUP	mtool_colo829_gsc_lifted|0/0|0.186,mtool_colo829_ont_lifted|0/0|0.106, mtool_colo829_pbr_lifted|0/0|0.205,mtool_colo829_vai_lifted|0/0|0.14
Chr7	104844620	104971856	DUP	127236	COLO829_SOMATIC_SV17_DUP	snf2_colo829_gsc_lifted|0/1|0.34,snf2_colo829_ont_lifted|0/1|0.39, snf2_colo829_pbr_lifted|0/1|0.35,snf2_colo829_vai_lifted|0/1|0.36	LHFPL3	Tumor suppressor
Chr7	110753275	110754402	DEL	-1127	COLO829_SOMATIC_SV18_DEL	mtool_colo829_gsc_lifted|0/0|0.213,mtool_colo829_ont_lifted|0/1|0.256, mtool_colo829_pbr_lifted|0/1|0.236,mtool_colo829_vai_lifted|0/1|0.256	IMMP2L	Tumor suppressor
Chr7	126106070	126526847	DEL	-420777	COLO829_SOMATIC_SV19_DEL	snf2_colo829_gsc_lifted|0/1|0.55,snf2_colo829_ont_lifted|0/1|0.73, snf2_colo829_pbr_lifted|0/1|0.70,snf2_colo829_vai_lifted|0/1|0.34	GRM8	Lung cancer associated
Chr7	126458434	126527387	INV	68953	COLO829_SOMATIC_SV20_INV	snf2_colo829_gsc_lifted|0/1|0.38,snf2_colo829_ont_lifted|0/1|0.38, snf2_colo829_pbr_lifted|0/1|0.34,snf2_colo829_vai_lifted|0/1|0.35	GRM8	Lung cancer associated
Chr7	144262134	144391701	DEL	-129567	COLO829_SOMATIC_SV21_DEL	snf2_colo829_gsc_lifted|0/1|0.27,snf2_colo829_ont_lifted|0/1|0.27, snf2_colo829_pbr_lifted|0/1|0.55,snf2_colo829_vai_lifted|0/1|0.26	None
Chr7	151049571	N[chr15:84141972[	BND	1	COLO829_SOMATIC_SV22_BND	snf2_colo829_gsc_lifted|0/1|0.55,snf2_colo829_ont_lifted|0/1|0.63, snf2_colo829_pbr_lifted|1/1|0.81,snf2_colo829_vai_lifted|0/1|0.61	ASIC3	Pancreatic cancer associated
Chr7	158335304	158335489	DEL	-185	COLO829_SOMATIC_SV23_DEL	mtool_colo829_ont_lifted|1/1|1.0,mtool_colo829_vai_lifted|1/1|0.818	PTPRN2	Cancer related
Chr8	130235870	130262401	DUP	26531	COLO829_SOMATIC_SV24_DUP	mtool_colo829_gsc_lifted|0/0|0.165,mtool_colo829_ont_lifted|0/0|0.111, mtool_colo829_vai_lifted|0/0|0.12
Chr9	28031837	28031837	INV	27305	COLO829_SOMATIC_SV25_INV	mtool_colo829_gsc_lifted|0/1|0.467,mtool_colo829_ont_lifted|0/1|0.5, mtool_colo829_pbr_lifted|0/1|0.442,mtool_colo829_vai_lifted|0/1|0.419	LINGO2	Cancer related
Chr9	28031865	28034469	INV	2604	COLO829_SOMATIC_SV26_INV	mtool_colo829_gsc_lifted|0/1|0.297,mtool_colo829_ont_lifted|0/1|0.327, mtool_colo829_pbr_lifted|0/1|0.312,mtool_colo829_vai_lifted|0/1|0.339	LINGO2	Cancer related
Chr9	28034301	28157694	DEL	-123393	COLO829_SOMATIC_SV27_DEL	snf2_colo829_gsc_lifted|0/1|0.50,snf2_colo829_ont_lifted|1/1|1.00, snf2_colo829_pbr_lifted|1/1|0.81,snf2_colo829_vai_lifted|1/1|1.00
Chr10	7090915	N[chr19:17286830[	BND	1	COLO829_SOMATIC_SV28_BND	snf2_colo829_gsc_lifted|0/1|0.37,snf2_colo829_ont_lifted|0/1|0.33, snf2_colo829_pbr_lifted|0/1|0.26,snf2_colo829_vai_lifted|0/1|0.25	ANKLE1	Cancer related
Chr10	7592410	N]chr18:9868619]	BND	1	COLO829_SOMATIC_SV29_BND	snf2_colo829_gsc_lifted|0/0|0.10,snf2_colo829_ont_lifted|0/0|0.15, snf2_colo829_pbr_lifted|0/1|0.25,snf2_colo829_vai_lifted|0/0|0.21	ITIH5 (Manual inspection added)	Tumor suppressor
Chr10	87940543	87952372	DEL	-11829	COLO829_SOMATIC_SV31_DEL	mtool_colo829_gsc_lifted|1/1|1.0,mtool_colo829_ont_lifted|1/1|0.8, mtool_colo829_pbr_lifted|1/1|1.0,mtool_colo829_vai_lifted|1/1|1.0	PTEN	Tumor suppressor
Chr11	81074560	81382737	DEL	-308177	COLO829_SOMATIC_SV32_DEL	snf2_colo829_gsc_lifted|0/1|0.53,snf2_colo829_ont_lifted|1/1|0.79, snf2_colo829_pbr_lifted|0/1|0.58,snf2_colo829_vai_lifted|0/1|0.76	None
Chr12	129287231	129287231	INS	267	COLO829_SOMATIC_SV33_INS	mtool_colo829_gsc_lifted|0/1|0.724,mtool_colo829_ont_lifted|0/1|0.62, mtool_colo829_pbr_lifted|0/1|0.645,mtool_colo829_vai_lifted|0/1|0.725	TMEM132D	Ovarian cancer
Chr14	34545553	34545553	INS	2397	COLO829_SOMATIC_SV34_INS	mtool_colo829_gsc_lifted|1/1|1.0,mtool_colo829_ont_lifted|1/1|0.966, mtool_colo829_pbr_lifted|1/1|1.0,mtool_colo829_vai_lifted|1/1|1.0	Manual inspection added
Chr14	72547940	72547940	INS	97	COLO829_SOMATIC_SV35_INS	mtool_colo829_gsc_lifted|1/1|1.0,mtool_colo829_ont_lifted|1/1|0.981, mtool_colo829_pbr_lifted|1/1|1.0,mtool_colo829_vai_lifted|1/1|1.0	RGS6	Regulates cancer risk
Chr14	104093751	104093806	DEL	-55	COLO829_SOMATIC_SV36_DEL	snf2_colo829_gsc_lifted|1/1|1.00,snf2_colo829_ont_lifted|1/1|1.00, snf2_colo829_pbr_lifted|1/1|1.00,snf2_colo829_vai_lifted|1/1|1.00
Chr14	105230166	105230166	INS	199	COLO829_SOMATIC_SV37_INS	mtool_colo829_gsc_lifted|0/0|0.175, mtool_colo829_pbr_lifted|0/1|0.222
Chr15	23440460	23461733	INV	21273	COLO829_SOMATIC_SV38_INV	mtool_colo829_pbr_lifted|0/0|0.185,mtool_colo829_vai_lifted|0/0|0.125
Chr15	23467456	23472023	DEL	-4567	COLO829_SOMATIC_SV39_DEL	mtool_colo829_gsc_lifted|0/0|0.164,mtool_colo829_ont_lifted|0/0|0.129, mtool_colo829_pbr_lifted|0/0|0.152,mtool_colo829_vai_lifted|0/0|0.176
Chr15	23586515	23747557	INV	161042	COLO829_SOMATIC_SV40_INV	snf2_colo829_gsc_lifted|0/1|0.30,snf2_colo829_ont_lifted|0/1|0.39, snf2_colo829_pbr_lifted|0/1|0.36,snf2_colo829_vai_lifted|0/1|0.27	MKRN3, MAGEL2, NDN	Lung cancer
Chr15	41329096	41336308	DUP	7212	COLO829_SOMATIC_SV41_DUP	snf2_colo829_gsc_lifted|0/1|0.44,snf2_colo829_ont_lifted|0/0|0.11, snf2_colo829_pbr_lifted|0/1|0.43,snf2_colo829_vai_lifted|0/0|0.16
Chr16	58590638	58629419	DEL	-38781	COLO829_SOMATIC_SV42_DEL	mtool_colo829_gsc_lifted|1/1|1.0,mtool_colo829_ont_lifted|1/1|1.0, mtool_colo829_pbr_lifted|1/1|1.0,mtool_colo829_vai_lifted|1/1|1.0
Chr16	78894743	79061104	DEL	-166361	COLO829_SOMATIC_SV43_DEL	snf2_colo829_gsc_lifted|0/1|0.65,snf2_colo829_ont_lifted|1/1|1.00, snf2_colo829_pbr_lifted|1/1|0.79,snf2_colo829_vai_lifted|1/1|1.00	WWOX	Tumor suppressor
Chr18	68712223	68715587	DEL	-3364	COLO829_SOMATIC_SV44_DEL	mtool_colo829_gsc_lifted|0/0|0.208,mtool_colo829_ont_lifted|0/1|0.261, mtool_colo829_pbr_lifted|0/0|0.214,mtool_colo829_vai_lifted|0/0|0.185	TMX3	Cell proliferation
Chr19	17286003	N[chr10:7017548[	BND	1	COLO829_SOMATIC_SV45_BND	snf2_colo829_gsc_lifted|0/1|0.29,snf2_colo829_ont_lifted|0/1|0.32, snf2_colo829_pbr_lifted|0/0|0.17,snf2_colo829_vai_lifted|0/1|0.24	ANKLE1	Cancer related
Chr20	13180079	13183451	DEL	-3372	COLO829_SOMATIC_SV46_DEL	mtool_colo829_gsc_lifted|0/1|0.5,mtool_colo829_ont_lifted|0/1|0.479, mtool_colo829_pbr_lifted|0/1|0.459,mtool_colo829_vai_lifted|0/1|0.492	None
Chr20	14982313	15033302	DEL	-50989	COLO829_SOMATIC_SV47_DEL	snf2_colo829_gsc_lifted|0/1|0.28,snf2_colo829_ont_lifted|0/1|0.27, snf2_colo829_pbr_lifted|0/1|0.28,snf2_colo829_vai_lifted|0/1|0.33	MACROD2	Cervical cancer
Chr20	15019976	15033194	DEL	-13218	COLO829_SOMATIC_SV48_DEL	mtool_colo829_gsc_lifted|0/1|0.358,mtool_colo829_ont_lifted|0/1|0.233, mtool_colo829_pbr_lifted|0/1|0.424,mtool_colo829_vai_lifted|0/1|0.278	MACROD2	Cervical cancer
Chr22	33363264	33442413	DEL	-79149	COLO829_SOMATIC_SV49_DEL	snf2_colo829_gsc_lifted|0/1|0.27,snf2_colo829_ont_lifted|0/1|0.25, snf2_colo829_pbr_lifted|0/0|0.20,snf2_colo829_vai_lifted|0/1|0.38	LARGE1	Liver cancer
ChrX	31178824	31198083	DEL	-19259	COLO829_SOMATIC_SV50_DEL	mtool_colo829_gsc_lifted|0/1|0.552,mtool_colo829_ont_lifted|0/1|0.7, mtool_colo829_pbr_lifted|0/1|0.61,mtool_colo829_vai_lifted|0/1|0.559	DMD	Cancer related
ChrX	31283087	32020633	DEL	-737546	COLO829_SOMATIC_SV51_DEL	snf2_colo829_gsc_lifted|1/1|0.90,snf2_colo829_ont_lifted|1/1|1.00, snf2_colo829_pbr_lifted|1/1|1.00,snf2_colo829_vai_lifted|1/1|1.00	DMD	Cancer related
ChrX	32059739	32274980	DEL	-215241	COLO829_SOMATIC_SV52_DEL	snf2_colo829_gsc_lifted|1/1|0.81,snf2_colo829_ont_lifted|0/1|0.65, snf2_colo829_pbr_lifted|1/1|1.00,snf2_colo829_vai_lifted|0/1|0.70	DMD	Cancer related
ChrX	32080417	32183134	DEL	-102717	COLO829_SOMATIC_SV53_DEL	snf2_colo829_gsc_lifted|1/1|1.00,snf2_colo829_ont_lifted|1/1|1.00, snf2_colo829_pbr_lifted|1/1|1.00,snf2_colo829_vai_lifted|1/1|1.00	DMD	Cancer related
ChrX	34041660	34044502	DEL	-2842	COLO829_SOMATIC_SV54_DEL	mtool_colo829_gsc_lifted|1/1|0.894,mtool_colo829_ont_lifted|1/1|0.915, mtool_colo829_pbr_lifted|1/1|1.0,mtool_colo829_vai_lifted|1/1|0.938	None
					.

## Sheet: SuppTable10 COLO829-lifted benc
Supplementary Table 10: COLO829-lifted benchamrk
Lifted (T2T to GRCh38)					Initial classification			Benchmark
#CHROM	POS	SVTYPE	SVLEN	ID	TP	FP	FN	#CHROM	POS	SVTYPE	SVLEN	ID
					0	0	1	chr1	86871328	BND	1	truthset_1_1
Chr1	207807886	DEL	-33588	COLO829_SOMATIC_SV_01_DEL	1	0	0	chr1	207807886	DEL	-33591	truthset_3_1
Chr1	224458901	DUP	153518	COLO829_SOMATIC_SV_02_DUP	1	0	0	chr1	224458901	DUP	153517	truthset_4_1
Chr1	224595102	DEL	-3221	COLO829_SOMATIC_SV_03_DEL	1	0	0	chr1	224595093	DEL	-3239	truthset_5_1
Chr1	236097142	INS	11260	COLO829_SOMATIC_SV_04_INS	0	1	0
Chr3	24523615	INV	1073	COLO829_SOMATIC_SV_05_INV	1	0	0	chr3	24523617	INV	1074	truthset_6_1
					0	0	1	chr3	25359111	BND	1	truthset_7_1
					0	0	1	chr3	25359568	BND	1	truthset_8_1
					0	0	1	chr3	26390427	BND	1	truthset_9_1
Chr3	26622427	INV	574	COLO829_SOMATIC_SV_06_INV	1	0	0	chr3	26622431	INV	577	truthset_10_1
Chr3	60147027	DEL	-71809	COLO829_SOMATIC_SV_07_DEL	1	0	0	chr3	60147026	DEL	-71789	truthset_11_1
Chr3	60886452	DEL	-141091	COLO829_SOMATIC_SV_08_DEL	1	0	0	chr3	60886452	DEL	-141091	truthset_12_1
					0	0	1	chr3	186724386	DEL	-71459	truthset_13_1
Chr4	65346239	DUP	80	COLO829_SOMATIC_SV_09_DUP	1	0	0	chr4	65346239	DUP	80	truthset_14_1
Chr4	187075166	INS	62	COLO829_SOMATIC_SV_10_INS	1	0	0	chr4	187075168	DUP	60	truthset_15_1
Chr5	28787890	DEL	-175099	COLO829_SOMATIC_SV_11_DEL	1	0	0	chr5	28787889	DEL	-175100	truthset_16_1
					0	0	1	chr6	26193889	INV	289	truthset_18_1
					0	0	1	chr6	138452922	BND	1	truthset_19_1
					0	0	1	chr6	138453044	BND	1	truthset_20_1
Chr7	57403872	DEL	-32529	COLO829_SOMATIC_SV_12_DEL	1	0	0	chr7	57403873	DEL	-24534	truthset_22_1
Chr7	75595250	INS	54	COLO829_SOMATIC_SV_13_INS	0	1	0
Chr7	78352523	DEL	-100409	COLO829_SOMATIC_SV14_DEL	1	0	0	chr7	78352522	DEL	-100409	truthset_23_1
Chr7	78560891	DEL	-67480	COLO829_SOMATIC_SV15_DEL	1	0	0	chr7	78560889	DEL	-67479	truthset_24_1
Chr7	86215351	DUP	9033	COLO829_SOMATIC_SV16_DUP	1	0	0	chr7	86215352	DUP	9032	truthset_25_1
Chr7	104844620	DUP	127236	COLO829_SOMATIC_SV17_DUP	1	0	0	chr7	104844621	DUP	127234	truthset_26_1
Chr7	110753275	DEL	-1127	COLO829_SOMATIC_SV18_DEL	1	0	0	chr7	110753276	DEL	-1129	truthset_27_1
Chr7	126106070	DEL	-420777	COLO829_SOMATIC_SV19_DEL	1	0	0	chr7	126106071	DEL	-420776	truthset_28_1
Chr7	126458434	INV	68953	COLO829_SOMATIC_SV20_INV	1	0	0	chr7	126458436	INV	68951	truthset_29_1
Chr7	144262134	DEL	-129567	COLO829_SOMATIC_SV21_DEL	1	0	0	chr7	144262133	DEL	-129568	truthset_30_1
Chr7	151049571	BND	1	COLO829_SOMATIC_SV22_BND	1	0	0	chr7	151049570	BND	1	truthset_31_1
Chr7	158335304	DEL	-185	COLO829_SOMATIC_SV23_DEL	0	1	0
					0	0	1	chr8	111050191	DEL	-1163	truthset_32_1
Chr8	130235870	DUP	26531	COLO829_SOMATIC_SV24_DUP	1	0	0	chr8	130235870	DUP	26531	truthset_33_1
Chr9	28031837	INV	27305	COLO829_SOMATIC_SV25_INV	1	0	0	chr9	28031837	INV	27305	truthset_34_1
Chr9	28031865	INV	2604	COLO829_SOMATIC_SV26_INV	1	0	0	chr9	28031865	INV	2604	truthset_35_1
Chr9	28034301	DEL	-123393	COLO829_SOMATIC_SV27_DEL	1	0	0	chr9	28034301	DEL	-123393	truthset_36_1
					0	0	1	chr10	7017550	BND	1	truthset_38_1
Chr10	7090915	BND	1	COLO829_SOMATIC_SV28_BND	1	0	0	chr10	7090912	BND	1	truthset_39_1
Chr10	7592410	BND	1	COLO829_SOMATIC_SV29_BND	1	0	0	chr10	7592410	BND	1	truthset_40_1
					0	0	1	chr10	33097525	DEL	-2732610	truthset_41_1
					0	0	1	chr10	53716587	DEL	-549	truthset_42_1
					0	0	1	chr10	58717662	BND	1	truthset_43_1
					0	0	1	chr10	81882050	DEL	-185860	truthset_44_1
Chr10	87940543	DEL	-11829	COLO829_SOMATIC_SV31_DEL	1	0	0	chr10	87940542	DEL	-12042	truthset_45_1
Chr11	81074560	DEL	-308177	COLO829_SOMATIC_SV32_DEL	1	0	0	chr11	81074557	DEL	-308180	truthset_46_1
Chr12	129287231	INS	267	COLO829_SOMATIC_SV33_INS	1	0	0	chr12	129287232	INS	255	truthset_48_1
Chr14	34545553	INS	2397	COLO829_SOMATIC_SV34_INS	0	1	0
Chr14	72547940	INS	97	COLO829_SOMATIC_SV35_INS	1	0	0	chr14	72547941	INS	96	truthset_49_1
Chr14	104093751	DEL	-55	COLO829_SOMATIC_SV36_DEL	1	0	0	chr14	104093751	DEL	-55	truthset_50_1
Chr14	105230166	INS	199	COLO829_SOMATIC_SV37_INS	0	1	0
					0	0	1	chr14	105867667	INS	100	truthset_51_1
Chr15	23440460	INV	21273	COLO829_SOMATIC_SV38_INV	1	0	0	chr15	23440461	BND	1	truthset_52_1
					0	0	1	chr15	23461732	BND	1	truthset_53_1
Chr15	23467456	DEL	-4567	COLO829_SOMATIC_SV39_DEL	0	1	0
Chr15	23586515	INV	161042	COLO829_SOMATIC_SV40_INV	1	0	0	chr15	23586513	INV	161040	truthset_54_1
Chr15	41329096	DUP	7212	COLO829_SOMATIC_SV41_DUP	1	0	0	chr15	41329096	DUP	7212	truthset_55_1
Chr16	58590638	DEL	-38781	COLO829_SOMATIC_SV42_DEL	1	0	0	chr16	58590641	DEL	-38786	truthset_56_1
Chr16	78894743	DEL	-166361	COLO829_SOMATIC_SV43_DEL	1	0	0	chr16	78894739	DEL	-166371	truthset_57_1
Chr18	68712223	DEL	-3364	COLO829_SOMATIC_SV44_DEL	1	0	0	chr18	68712224	DEL	-3365	truthset_58_1
Chr19	17286003	BND	1	COLO829_SOMATIC_SV45_BND	0	1	0
Chr20	13180079	DEL	-3372	COLO829_SOMATIC_SV46_DEL	1	0	0	chr20	13180082	DEL	-3374	truthset_59_1
Chr20	14982313	DEL	-50989	COLO829_SOMATIC_SV47_DEL	1	0	0	chr20	14982311	DEL	-50991	truthset_60_1
Chr20	15019976	DEL	-13218	COLO829_SOMATIC_SV48_DEL	1	0	0	chr20	15019977	DEL	-13219	truthset_61_1
Chr22	33363264	DEL	-79149	COLO829_SOMATIC_SV49_DEL	1	0	0	chr22	33363263	DEL	-79150	truthset_63_1
ChrX	31178824	DEL	-19259	COLO829_SOMATIC_SV50_DEL	1	0	0	chrX	31178826	DEL	-19268	truthset_64_1
ChrX	31283087	DEL	-737546	COLO829_SOMATIC_SV51_DEL	1	0	0	chrX	31283086	DEL	-737547	truthset_65_1
ChrX	32059739	DEL	-215241	COLO829_SOMATIC_SV52_DEL	1	0	0	chrX	32059738	DEL	-215242	truthset_66_1
ChrX	32080417	DEL	-102717	COLO829_SOMATIC_SV53_DEL	1	0	0	chrX	32080415	DEL	-102719	truthset_67_1
ChrX	34041660	DEL	-2842	COLO829_SOMATIC_SV54_DEL	1	0	0	chrX	34041661	DEL	-2927	truthset_68_1
					46	7	16

[truncated: 6 more sheets: SuppTable11 COLO829-lifted FP a, SuppTable12 COLO829-lifted FN a, SuppTable13 POG samples summary, SuppTable14 POG044 cancer SV ca, SuppTable15 POG1022 cancer SV c, SuppTable16 POG846 cancer SV ca]
